# 1 Ancestry-specific polygenic scores and SNP heritability of 2 25(OH)D in African- and European-ancestry populations

3  
4 Hatchell, Kathryn E.<sup>1</sup>; Lu, Qionshi<sup>2</sup>; Hebring, Scott J.<sup>3</sup>; Michos, Erin D.<sup>4</sup>; Wood, Alexis C.<sup>5</sup>; Engelman,  
5 Corinne D.<sup>1</sup>

6  
7 <sup>1</sup>Department of Population Health Sciences, University of Wisconsin-Madison School of Medicine and  
8 Public Health, Madison, Wisconsin, 53706, USA

9 <sup>2</sup>Department of Biostatistics and Medical Informatics, University of Wisconsin-Madison School of  
10 Medicine and Public Health, Madison, Wisconsin, 53706, USA

11 <sup>3</sup>Center for Human Genetics, Marshfield Clinic Research Institute, Marshfield, Wisconsin, 54449, USA

12 <sup>4</sup>Ciccarone Center for the Prevention of Cardiovascular Disease, Johns Hopkins University School of  
13 Medicine, Baltimore, Maryland, 21287, USA

14 <sup>5</sup>USDA/ARS Children's Nutrition Research Center, Baylor College of Medicine, Houston, Texas, 77030,  
15 USA

16  
17 **Short title:** Ancestry-specific 25(OH)D PGS and SNP heritability

18  
19 **Precis:** Ancestry-specific polygenic risk scores for 25(OH)D capture more genetic variance than do  
20 previous GWAS findings and could be leveraged to inform personalized vitamin D supplementation

21  
22 **Word Count:** 4,965

## 23 24 **Correspondence:**

25 Kathryn E Hatchell

26 155 Gibbs Street #436

27 Rockville, MD 20850

28 Email: [khatchell@geisinger.edu](mailto:khatchell@geisinger.edu)

29  
30 **Disclosures:** The authors have nothing to declare.

31  
32  
33  
34  
35  
36  
37  
38  
39  
40

41 **Abstract:**

42 **Context.** Vitamin D inadequacy, assessed by 25-hydroxyvitamin D [25(OH)D], affects around 50% of  
43 adults in the United States and is associated with numerous adverse health outcomes. Blood 25(OH)D  
44 concentrations are influenced by genetic factors that may determine how much vitamin D intake is  
45 required to reach optimal 25(OH)D. Despite large genome-wide association studies (GWASs), only a  
46 small portion of the genetic factors contributing to differences in 25(OH)D levels has been discovered.

47 **Objective.** Therefore, knowledge of a fuller set of genetic factors could be useful for risk prediction of  
48 25(OH)D inadequacy, personalized vitamin D supplementation, and prevention of morbidity and mortality  
49 from deficient 25(OH)D.

50 **Design.** Using PRSice and weights from published African- and European-ancestry GWAS summary  
51 statistics, ancestry-specific polygenic scores (PGSs) were created to capture a more complete set of  
52 genetic factors.

53 **Patients or Other Participants.** Participants (European ancestry n=9,569, African ancestry n=2,761)  
54 came from three cohort studies.

55 **Main Outcome Measure(s).** Blood concentrations of 25(OH)D.

56 **Results.** The PGS for African ancestry was derived using all input SNPs (a p-value cut-off of 1.0) and  
57 had an  $R^2$  of 0.3%; for European ancestry, the optimal PGS used a p-value cut-off of  $3.5 \times 10^{-4}$  in the  
58 target/tuning dataset and had an  $R^2$  of 1.0% in the validation cohort. Those with highest genetic risk had  
59 25(OH)D that was 2.8-3.0 ng/ml lower than those with lowest genetic risk ( $p=0.0463$  to  $3.2 \times 10^{-13}$ ),  
60 requiring an additional 467 to 500 IU of vitamin D intake to maintain equivalent 25(OH)D.

61 **Conclusions.** PGSs are a powerful predictive tool that could be leveraged for personalized vitamin D  
62 supplementation to prevent the negative downstream effects of 25(OH)D inadequacy.

63

64

65

66 **Keywords:** Genetics, ancestry, vitamin D, diet, polygenic risk score, heritability

67 **Introduction**

68

69 Vitamin D inadequacy, using the Institute of Medicine definition of a 25-hydroxyvitamin D  
70 [25(OH)D] concentration less than 20 ng/mL, affects almost 50% of adults in the United States, with  
71 higher prevalence in those with darker skin tones (1-3). Observational studies show associations between  
72 low vitamin D concentrations and numerous adverse health outcomes, including autoimmune diseases,  
73 migraines, hypertension, dyslipidemia, cardiovascular events, and cardiovascular mortality (1,3-9). These  
74 studies are supported by recent Mendelian randomization studies which provide evidence for a causal  
75 relationship between low vitamin D concentrations and increased risk of obesity, ovarian cancer,  
76 hypertension, lower cognitive function during aging, multiple sclerosis, and all cause and cancer mortality  
77 (10-16). Furthermore, some clinical trials have shown that vitamin D and calcium supplementation are  
78 important in the prevention of fractures and cardiovascular risk factors, while vitamin D supplementation  
79 alone may lower risk of cancers, diabetes and depression and may reduce inflammation and improve  
80 lung function in patients with cystic fibrosis (7,17-25). Recent results from the Vitamin D and Omega-3  
81 Trial (VITAL) showed null associations between vitamin D supplementation and cancer or cardiovascular  
82 disease. However, study design limits the interpretability of these findings; for example individuals with  
83 adequate 25(OH)D concentrations were included, and outside use of vitamin D before and during the trial  
84 were not restricted (26). Avoiding vitamin D inadequacy is important, however, as 25(OH)D  
85 concentrations over 50 ng/mL have been associated with increased morbidity and mortality (3,27).  
86 Clinical trials of vitamin D have shown that individual response to vitamin D supplementation is highly  
87 variable (28,29). 25(OH)D concentrations are influenced by genetic factors and genetic variants may  
88 determine how much vitamin D intake is required to reach an optimal 25(OH)D blood concentration (30-  
89 33). Therefore, knowledge of the genetic determinants of 25(OH)D concentrations could be useful for  
90 prediction of risk for vitamin D inadequacy, personalized vitamin D supplementation, and subsequent  
91 prevention of vitamin D associated morbidity and mortality due to 25(OH)D deficiency.

92 Variation in or near twelve genes (*A2BP1*, *AMDHD1*, *ANO6/ARID2*, *CYP2R1*, *CYP24A1*, *DAB1*,  
93 *DHCR7*, *GC*, *GPR114*, *HTR2A*, *KIF4B*, and *SEC23A*) has been associated with serum 25(OH)D at  
94 genome-wide levels of significance through published genome-wide association studies (GWASs) in  
95 those of European or African ancestry (1,34-37). However, only single nucleotide polymorphisms (SNPs)

96 in or near four of these genes have been replicated (*CYP2R1*, *CYP24A1*, *DHCR7*, and *GC*), and together  
97 account for a small portion of the variation in 25(OH)D concentrations, about 2.8% compared to the  
98 estimated 20-40% heritability (1,31,36). Such “missing heritability” is common in complex traits, and  
99 could, in part, be attributed to many SNPs with small effects that do not reach a stringent genome-wide  
100 significance threshold (38). A polygenic score (PGS), by comprising the weighted sum of trait-associated  
101 alleles, may capture more trait variation than individual SNPs alone. PGSs have been shown to be more  
102 powerful than individual SNP-based testing, are used in a wide variety of statistical techniques (e.g.,  
103 Mendelian randomization), and have shown clinical promise, predicting Alzheimer’s disease incidence  
104 before the onset of symptoms that would result in a clinical diagnosis, and for dosing of antifibrinolytic  
105 drugs based on activated partial thromboplastin time (aPTT) risk scores (39-42).

106 Yet challenges remain with developing PGS. Analyses suggest that only including SNPs reaching  
107 genome-wide significance in a PGS fails to capture much of the heritable variation and reduces the  
108 PGS’s prediction accuracy. However, deciding on a p-value threshold for including SNPs *a priori* is  
109 challenging. Recently, software has been developed which addresses this challenge, using summary  
110 statistics from GWAS to calculate a number of PGSs across a wide range of p-value thresholds for SNP  
111 inclusion and model fit statistics to determine the optimal threshold for predicting traits in a testing  
112 dataset, which is often less stringent than the genome-wide level (43).

113 To date, only a handful of studies have calculated PGSs for vitamin D concentrations, generally  
114 using only SNPs in genes that reached the stringent p-value threshold in existing vitamin D GWASs,  
115 therefore missing much of the genetic contribution to the phenotype (32,44-47). Given that several  
116 studies have reported genetic dependent response to vitamin D supplementation, PGSs hold predictive  
117 and preventive promise in relation to vitamin D concentrations (30,48,49).

118 The goal of the current study was to calculate ancestry-specific PGSs for 25(OH)D in individuals  
119 of European or African ancestry based on the results from a recent multi-ethnic GWAS meta-analysis  
120 (37), and to validate the PGS performance in an independent sample. Additionally, the proportion of SNP  
121 heritability captured by the PGS was quantified, using GCTA, and compared to that captured by the  
122 genome-wide significant SNPs.

123

124 **Materials and Methods**

125

126 *GWAS summary statistics*

127

128 The TRANS-ethniC Evaluation of vitamiN D GWAS consortium (TRANSCEN-D), performed the  
129 largest multi-ethnic vitamin D GWAS meta-analysis to date and included 13 cohorts (9 of African  
130 ancestry, 3 of Hispanic ancestry and the SUNLIGHT discovery cohort, a consortium of 15 European  
131 cohorts) (37). Here, ancestry-specific summary statistics from the African- and European-ancestry cohorts  
132 of TRANSCEN-D were leveraged for weighting of each SNP included in the PGS (37). This is referred to  
133 as the base dataset.

134

135 *Target/tuning dataset for calculation of PGS*

136

137 Using weights from the base dataset, PGSs were developed in an ancestry-specific manner for  
138 subsets of European- and African-ancestry samples from the Atherosclerosis in Communities (ARIC)  
139 study, which contains European- and African- ancestry participants (50). These ARIC subsets are  
140 referred to as the target/tuning datasets. ARIC data were obtained through dbGaP Study Accession:  
141 phs000090.v4.p1. ARIC data were selected as the target/tuning dataset as they included both sexes and  
142 had dense genotyping, essential for development of a comprehensive and generalizable PGS. ARIC is a  
143 prospective epidemiologic study conducted across four United States sites: Wake Forest Baptist Medical  
144 Center, Winston-Salem, NC; University of Mississippi Medical Center, Jackson, MS; University of  
145 Minnesota, Minneapolis, MN; Johns Hopkins University, Baltimore, MD. ARIC includes 15,792  
146 participants aged 45-64 at baseline, of which 9,086 have data required for this analysis (genomic data,  
147 25(OH)D, age, sex, body mass index (BMI), location and month of blood draw) which were ascertained at  
148 ARIC visit 2 (1990-1992). Of these 9,086 participants, 7,178 are of European ancestry. A random sample  
149 of 1,000 participants were chosen from the 7,178 eligible European-ancestry participants for tuning the  
150 optimal PGS model, the remaining samples were used to validate the PGS. From the 1,908 eligible  
151 participants of African ancestry from ARIC, only data from 57 participants had not been included in the  
152 TRANSCEN-D meta-analysis; these were used as the base dataset. Therefore, to ensure independence

153 between the base and target/tuning datasets only these 57 African-ancestry participants were selected  
154 into the target/tuning dataset.

155

156 *PGS validation cohort*

157

158 PGS validation was done using data combined across participants from three multi-ethnic  
159 cohorts: ARIC, the Multi-ethnic Study of Atherosclerosis (MESA) and the Women's Health Initiative (WHI),  
160 analyzed in an ancestry-specific manner. As above, ARIC provided data on 6,178 participants of  
161 European ancestry for the validation cohort. MESA is a prospective study of men and women ages 45-84  
162 who were recruited by Columbia University, New York, NY; Johns Hopkins University, Baltimore, MD;  
163 Northwestern University, Chicago, IL; University of Minnesota, Minneapolis, MN; University of California  
164 at Los Angeles, Los Angeles, CA and Wake Forest University, Winston-Salem, NC. Serum 25(OH)D was  
165 measured at MESA exam 1 (July 2000-August 2002). MESA data were obtained through dbGaP Study  
166 Accession: phs000209.v13.p3. MESA provided data on 1,936 European- and 342 African-ancestry  
167 participants who maintained independence from TRANSCEN-D for the validation cohort. Women  
168 participating in WHI were recruited from 40 clinical centers in the United States. Serum 25(OH)D was  
169 measured as part of the Calcium and Vitamin D (CaD) Trial (51). WHI data were obtained through dbGaP  
170 Study Accession: phs000200.v11.p3. Participants were included if they had the minimum set of variables:  
171 genome-wide data, serum 25(OH)D, age, sex, BMI, and month of blood draw. WHI provided data on 455  
172 European- and 700 African-ancestry participants for the validation cohort. Thus, together, in the validation  
173 cohort, the European-ancestry sample included 8,569 participants and the African-ancestry sample  
174 included 1,042 participants.

175

176 *Datasets used for heritability estimation*

177 Heritability estimates were calculated using eligible participants (N=8,838) of both European  
178 (n=7,119) and African (n=1,719) ancestry from ARIC.

179 Participant consent was previously obtained for each study providing data; additionally, IRB  
180 approval was granted for this specific mega-analysis.

181 *Data Quality Control*

182

183 Data cleaning for phenotypic data included winsorizing 25(OH)D in the MESA and WHI samples  
184 to account for outliers (52). In the WHI sample, participants with 25(OH)D values far above the maximum  
185 level of detection (150 ng/mL), none of which had extreme vitamin D intake (including supplement use) or  
186 sun exposure, were removed from the sample; this included 68 participants of European ancestry and  
187 119 participants of African ancestry. All 25(OH)D values were log transformed to improve the normality of  
188 the distribution in each cohort.

189 Genotyping methods are available in Supplemental Table 1 and described in more detail  
190 elsewhere (53-57). In summary, QC removed: sex mismatches, samples and SNPs with high  
191 missingness (>5%), SNPs with low minor allele frequency (MAF<0.2%), and SNPs out of Hardy-Weinberg  
192 equilibrium (HWE<0.05/number of SNPs; Bonferroni adjusted cut-off). Datasets were imputed using the  
193 Michigan Imputation Server (58,59). European samples were imputed to the Haplotype Reference  
194 Consortium (HRC) and African samples were imputed to the Consortium on Asthma among African-  
195 ancestry Populations in the Americas (CAAPA) (59,60). Post imputation QC included: removing SNPs  
196 with a low quality score (<0.8) or MAF (<0.1%). Additionally, sample and SNP level missingness as well  
197 as HWE cutoffs were rechecked. Supplemental Figures 1-2 and Supplemental Table 1 give specifics on  
198 quality control for each cohort. QC was performed using PLINK v1.9 and vcfTools (61,62). Ancestry was  
199 determined by self-reported data and confirmed with principal components analysis (PCA) in PLINK using  
200 1000 Genomes data as anchoring populations (63).

201

202 *Measurement of 25(OH)D*

203

204 Blood 25(OH)D concentration was measured by the studies using different assay types. WHI  
205 used the DiaSorin LIASON chemiluminescence, while both MESA and ARIC used liquid chromatography-  
206 mass spectrometry (LCMS), which is considered the gold standard for 25(OH)D measurement (64,65).  
207 Vitamin D concentration [25(OH)D] was log transformed to improve normality of the distribution. To  
208 control for differences in vitamin D concentrations due to different assays, 25(OH)D concentrations were  
209 converted to z-scores within studies for combined cohort analyses.

210 *Measurement of vitamin D intake*

211 Dietary data were collected via questionnaire. Each study used their own questionnaire. WHI  
212 used the Food Frequency Questionnaire supplemented with interview questions. ARIC and MESA both  
213 used their own implementation of a food intake questionnaire. From the questionnaire data, each study  
214 created a derived variable of typical vitamin D intake (measured in IU or mcg). All values were converted  
215 to IU for analysis. Additionally, WHI collected data on vitamin D supplement use at the same visit that  
216 25(OH)D was assessed. The sum of vitamin D intake from food and supplements was calculated and  
217 used for supplemental and sensitivity analyses, otherwise dietary intake alone was used.

218

219 *Calculation of available UV radiation*

220 Available UV radiation was calculated based on the month of blood draw and location;  
221 participants were assigned continuous available UV radiation values. Available UV radiation values  
222 assigned were an average UV-index for the month prior to blood draw (the relevant exposure period). UV  
223 data come from the National Weather Service Climate Prediction Center historical database. When  
224 available, UV radiation values corresponded to the exact location and year of the participant's blood draw.  
225 When exact cities or years were not available, averages across nearby locations or years were used. See  
226 Supplemental Tables 2-4 for specific month, year and location values used. Descriptive statistics for  
227 available UV radiation values by site and month are also presented in Supplemental Tables 5-7; the UV  
228 radiation values ranged from 0.7 to 9.5 UV Index units.

229

230 *Determining optimal PGS*

231

232 An optimal p-value cutoff and corresponding PGS were determined by calculating PGSs across a  
233 wide range of p-value thresholds and testing the association between the PGS and log[25(OH)D] in the  
234 target/tuning dataset. First, summary statistics were attained from TRANSCEN-D, the base dataset  
235 (1,37), which included SNPS with MAF > 0.01 and tested them for association with log[25(OH)D] using an  
236 additive genetic model adjusting for age, sex, BMI, UV index and principal components (PCs) 1-10. PGSs



237 were then calculated in PRSice v2, which computes the sum of reference allele counts at each SNP  
238 weighted by the effect size ( $\beta$ ) for that SNP from the TRANSCEN-D consortium (43). PGS weights came  
239 from ancestry-specific z-scores from TRANSCEN-D that were converted to betas with the deterministic  
240 relationship:  $\beta = z / (\text{sqrt}(2p(1-p) * N))$ , where  $p$  is the allele frequency for the reference SNP (66). One  
241 tuning parameter in PGS development is the LD cutoff used for clumping to prevent SNPs in one  
242 correlated region from dominating the PGS. Here, PGSs were calculated in the target/tuning dataset  
243 using two different LD cut-offs,  $r^2 \geq 0.5$  or  $\geq 0.2$ , keeping the SNP with the strongest effect in the base  
244 dataset. SNPs in LD with one another were clumped, using the --clump-r2 option in PRSice v2. The LD  
245 cutoff that yielded the PGS that explains the most variance in 25(OH)D was used in downstream  
246 analyses. Given the small African-ancestry sample, a reference panel (remaining ARIC African-ancestry  
247 dataset  $n = 1,900$ ) was used to determine LD.

248 To determine which set of SNPs to include in the PGS, SNPs at or below a given p-value  
249 threshold in the base dataset were included in the PGS and tested in a linear regression model for  
250 association with log[25(OH)D in the target/tuning dataset]. P-value thresholds from  $5 \times 10^{-5}$ -0.5 were tested  
251 incrementing by  $5 \times 10^{-5}$  at each iteration (supplemental testing using a p-value threshold of 1.0 was  
252 performed). All testing was done using PRSice v2 (43). The threshold with the PGS explaining the most  
253 variance in log[25(OH)D] was selected as the most optimal PGS.  $R^2$ , or the coefficient of determination,  
254 was calculated to measure the proportion of phenotypic variance explained by the model. Linear  
255 regression models were used to calculate the  $R^2$  of a given PGS while controlling for participant age, sex,  
256 BMI, available UV radiation, and PCs for ancestry. Five PCs were controlled for in the African-ancestry  
257 models and two PCs in the European-ancestry models, as determined based on the 'elbow' of cohort-  
258 and ancestry-specific scree plots. Sensitivity analysis was performed including dietary intake in the model,  
259 as dietary intake is a strong predictor of 25(OH)D concentrations. However, with the inclusion of dietary  
260 intake in the model, the optimal PGS (and p-value cutoff) remained the same for the European cohort, but  
261 reduced sample size substantially in the African-ancestry cohort. Therefore, to maintain sample size,  
262 dietary intake was not included in the model to determine the optimal p-value cutoff (Supplemental Table  
263 8).

264

265 *PGS performance validation*

266

267 PGS performance was validated in an ancestry-specific manner using participants in validation  
268 cohorts, which were combined cohorts of samples from ARIC, MESA, and WHI that maintained  
269 independence from TRANSCEN-D and PGS development samples. The PGS was applied to the  
270 participants in the validation dataset in accordance with the ancestry specific p-value cutoff. The  
271 relationship between PGS quantile and 25(OH)D was tested using a linear regression model controlling  
272 for age, sex, BMI, available UV radiation, and PCs for ancestry. Quantile plots were created depicting the  
273 relationship between PGS decile and 25(OH)D concentration. Sensitivity analyses were performed to  
274 ensure that the study design of the WHI CaD randomized control trial was not biasing the results.

275

276 *Supplemental PGS Analyses*

277 The African-ancestry target/tuning cohort was small (n=57) due to limited genome-wide data in  
278 those of African ancestry. To explore if the small sample reduced prediction for those of African ancestry,  
279 a PGS was created from all independent SNPs (p-value cutoff = 1.0;  $r^2$  cutoff = 0.5) in the full  
280 independent sample of African-ancestry participants which maintained independence from TRANSCEN-D  
281 (n=1,099) (67). Additionally, to test the importance of ancestrally-matched base and target sets, this PGS  
282 was also created using European-ancestry GWAS summary statistics for weighting of the PGS.

283

284 *Heritability Estimation*

285

286 Heritability estimates were calculated using GCTA v1.26 (68). Heritability was estimated several  
287 ways: (1) ancestry-specific overall SNP heritability, (2) ancestry-specific SNP heritability of the PGS  
288 (where sample size allowed) and (3) ancestry-specific SNP heritability of previous replicated GWAS  
289 findings in *CYP2R1*, *CYP24A1*, *DHCR7*, and *GC* (1,34,37). In each case, the model was adjusted for  
290 age, sex, BMI, available UV, and dietary vitamin D intake.

291 SNP heritability estimates were calculated using all genotyped and imputed SNPs for both the

292 European and African ancestry populations from ARIC; this was 8,315,761 and 9,335,785 SNPs,

293 respectively. Partitioned heritability estimates were discerned paralleling methodology described by the

294 SUNLIGHT consortium (36). To estimate heritability captured by the PGS, heritability was calculated  
295 twice; once using the clumped set of SNPs used to determine the PGS (228,867 SNPs for European  
296 ancestry and 850,697 for African ancestry) and a second time using the clumped set of SNPs with SNPs  
297 included in the PGS removed (228,526 SNPs for European ancestry and 818,428 for African ancestry).  
298 The difference in heritability estimates between these two models was the heritability explained by the  
299 PGS. Heritability could not be directly calculated from the SNPs in the PGS because one of the  
300 assumptions made by the GCTA modeling is an average null effect of the SNPs on the outcome. Of note,  
301 the African-ancestry sample was too small for this analysis to be valid, so heritability attributed to the PGS  
302 was only calculated in those of European ancestry. In discerning the heritability captured by previous  
303 replicated GWAS studies, heritability was calculated using a reduced set of SNPs: the full genotyped and  
304 imputed set with top GWAS findings (and SNPs in the surrounding LD block) removed (36,69). The  
305 difference between this estimate and the overall heritability estimates was the heritability attributed to  
306 previous replicated GWAS findings. Additionally, a second heritability estimate was calculated that  
307 included novel findings. This included SNPs from *AMDHD1* and *SEC23A* in those of European ancestry  
308 and SNPs from *KIF4B*, *HTR2A* and *ANO6/ARID2* in those of African ancestry (36,37). Table 1  
309 summarizes the SNPs and LD blocks removed in each scenario. LD block size was determined using the  
310 Plots mode of the SNAP tool by the Broad (69). All models were fit separately for European and African  
311 ancestry samples.

312

## 313 **Results**

### 314 *Determining the optimal PGS*

315

316 Table 2 shows sample characteristics for each analysis. Table 3 shows statistics for the best  
317 performing PGS for each ancestry in the target/tuning and validation datasets while controlling for age,  
318 sex, BMI, available UV radiation, and PCs for ancestry. In both ancestries, the PGS using the LD cut-off  
319 of 0.5 was more strongly associated with and explained more of the variance in log[25(OH)D] than did the  
320 PGS using the LD cut-off of 0.2 (Supplemental Table 9). Therefore, this was the LD cutoff utilized going  
321 forward. In the European-ancestry analyses, the optimal PGS explained 1.4% of the variance in

322 log[25(OH)D] ( $p=9.3 \times 10^{-5}$ ) in the target/tuning dataset and 1.0% of the variance ( $p=1.1 \times 10^{-23}$ ) in the  
323 validation cohort. In the African-ancestry analyses, the PGS explained 2.9% of the variance in  
324 log[25(OH)D] ( $p=0.11$ ) in the target/tuning dataset and 0.2% of the variance ( $p=0.15$ ) in the validation  
325 cohort. Of note, the optimally performing PGS in the African-ancestry target/tuning dataset contained  
326 many more SNPs than that from the European-ancestry dataset, mostly due to the less stringent p-value  
327 cutoff, but also because a larger number of SNPs remained post clumping (850,697 vs 228,867) due to  
328 smaller LD blocks in the African-ancestry sample and more input SNPs from the TRANSCEN-D summary  
329 statistics (8.4 million in the African-ancestry vs 1.2 million in the European-ancestry sample). Figure 1  
330 depicts the results visually, where a taller bar corresponds to a larger percent of the phenotypic variance  
331 explained by the PGS.

332 In supplementary analyses for the African-ancestry cohort, the PGS using the full African-  
333 ancestry sample that was independent from TRANSCEN-D ( $n=1,099$ ; p-value cutoff = 1.0;  $r^2$  cutoff = 0.5)  
334 explained more variance (0.31% vs 0.2%) and had a stronger association ( $p=0.0545$  vs 0.15) than the  
335 optimal PGS determined from PRSice using the small tuning cohort ( $n=57$ ) and larger validation cohort  
336 ( $n=1042$ ), therefore this PGS was chosen as most optimal and used moving forward. In additional  
337 analyses to test the importance of ancestrally-matched base and target sets, the PGS (p-value cutoff =  
338 1.0;  $r^2$  cutoff = 0.5) developed from European-ancestry TRANSCEN-D summary statistics only explained  
339 0.14% of the variance ( $p=0.1897$ ; worse performance than the PGS developed from African-ancestry  
340 TRANSCEN-D summary statistics that explained 0.31% of the variance in 25(OH)D [ $p=0.0545$ ]). Results  
341 are shown in Table 3 and Supplemental Table 10.

342 After the optimal, ancestry-specific PGS was discerned, the relationship between the PGS and  
343 25(OH)D was investigated using ancestry-specific combined cohorts of samples from ARIC, MESA and  
344 WHI, which maintained independence from the TRANSCEN-D (and tuning, for those of European  
345 ancestry) samples. Characteristics of these samples are summarized in Table 2. Figures 2 and 3 show  
346 ancestry-specific plots for 25(OH)D by decile of the PGS. In general, those with greater genetic risk (lower  
347 PGS and quantile) have lower 25(OH)D concentrations. For a clinically-based interpretation, in the  
348 European validation cohort (Figure 2,  $n=8,569$ ), those with the lowest PGS have vitamin D concentrations  
349 3.0 ng/ml lower than those with the highest PGS ( $p=3.2 \times 10^{-13}$ ). Figure 3 shows the trend for those of

350 African ancestry (n=1,099; combined tuning and validation samples from Table 2); those with the lowest  
351 PGS have vitamin D concentrations 2.8 ng/ml lower than those with the highest PGS (p=0.0463). Results  
352 from the PGS determined using the separate tuning and validation cohorts are included in Supplemental  
353 Figure 3.

354 Sensitivity analyses showed there was no significant difference in 25(OH)D concentration  
355 between participants on the treatment arm compared to the placebo arm in the participants from WHI.  
356 Additionally, there was no significant difference in PGS-25(OH)D trend in WHI compared to the other  
357 cohorts.

358  
359 *Heritability estimation*

360  
361 Participant characteristics are summarized in Table 2. Overall and stratified SNP heritability  
362 estimates for those of European or African ancestry are summarized in Figure 4 and Supplemental Figure  
363 4, respectively. SNP heritability is higher in the African-ancestry cohort compared to the European-  
364 ancestry cohort (32% vs 22%; standard errors 17.8 and 5.2, respectively (p=0.49). In those of European  
365 ancestry, the PGS accounts for 17.1% (3.7/21.6) of the SNP heritability of 25(OH)D concentrations and  
366 previous replicated GWAS findings (i.e., SNPs from *CYP2R1*, *CYP24A1*, *DHCR7* and *GC*) account for  
367 6.9% (1.5/21.6) of the total SNP heritability (1,34,37). In those of African ancestry, these same top GWAS  
368 findings accounted for only 1.6% (0.5/32.2) of the total SNP heritability. Heritability accounted for by  
369 previous GWAS findings remained unchanged when ancestry-specific novel findings were included in the  
370 heritability estimations (1,34,36,37). African-ancestry sample size was too small to calculate heritability  
371 accounted for by the PGS.

372  
373 **Discussion**

374  
375 Vitamin D inadequacy is a pervasive health problem, with a strong genetic basis. However, to  
376 date, much of the heritability of 25(OH)D remains unexplained. Furthermore, there is a tremendous gap in  
377 the research carried out in minority ancestries compared to European ancestry. Filling these knowledge  
378 gaps is critical in preventive care to manage 25(OH)D concentration, especially as we move towards

379 precision medicine, and development of an ancestry-specific PGS is one way to address these gaps. To  
380 date, across all phenotypes, most PGS have been calculated in those of European ancestry. A handful of  
381 studies have begun to explore ancestry-specific PGS, however, none of these approaches utilize an  
382 entirely ancestry-specific approach as was undertaken here (70-72). Given the underlying genetic  
383 difference between ancestries (i.e., different LD patterns and allele frequencies), an ancestry-specific  
384 approach is more appropriate. Calculating PGSs using GWAS summary statistics from an ancestry-  
385 matched population accounts for differences in linkage disequilibrium (LD) and allele frequencies that  
386 exist between ancestral groups leading to differences in allele effect sizes, which are used as weights in  
387 the PGS calculation. Here, optimal PGSs were discerned and validated in an ancestry-specific manner.  
388 Heritability explained by the PGS and previous GWAS findings was compared to overall SNP heritability.

389         The relationship between the PGS and 25(OH)D concentrations was consistent across ancestries  
390 in the validation cohorts, albeit modest variance was explained by the PGS; those with the lowest PGS  
391 (most risk) had the lowest 25(OH)D concentrations. Moving from the highest to lowest quantile changed  
392 25(OH)D concentrations by 2.8-3.0 ng/ml, a statistically significant and clinically meaningful difference.  
393 One study reported that for each additional 100 IU of vitamin D consumed, serum 25(OH)D levels  
394 increased by 0.6 ng/ml (73). Using this conversion, compared to those with lowest genetic risk, those with  
395 highest genetic risk could require an additional 467 to 500 IU of vitamin D to maintain comparable levels.  
396 While the small sample used to determine the p-value cut-off in those of African ancestry could have led  
397 to overfitting of the model, the consistent direction of effect between PGS quantile and 25(OH)D  
398 concentrations suggests clinical utility for a 25(OH)D PGS to inform vitamin D supplementation in those  
399 with high genetic risk for 25(OH)D inadequacy.

400         The portion of phenotypic variance explained by the PGS was modest due to many concurrent  
401 influences. First, the PGS did not include rare variants (MAF < 0.01) as they were removed from the base  
402 set (TRANSCEN-D). Common SNPs account for only a small proportion of genetic variance in complex  
403 traits (38). Future PGSs that include rare variants will likely account for a greater portion of the variance.  
404 Additionally, the variance that the PGS can capture is limited by the input SNPs. In the best-case  
405 scenarios (i.e. densest chips), the overlap between the SNPs in the base and target datasets was  
406 3,520,049 and 1,026,643 SNPs, for African and European ancestries, respectively. While over 1 million

407 SNPs can be very informative, much of the genome was not included. Thirdly, PRSice implements  
408 clumping which keeps only the SNP with the strongest association for SNPs in LD ( $r^2 > 0.5$  used here) in  
409 any given 500kb window, thus reducing the maximum variability that could be captured by a PGS.

410 Supplementary analyses performed in the full independent sample of African ancestry  
411 participants (n=1,099) demonstrated (1) the importance of a large tuning sample and (2) the importance  
412 of ancestrally-matched base and target sets. Comparing the results from the small tuning sample (n=57)  
413 and the analysis using the full independent sample of African-ancestry participants (n=1,099), more  
414 variance, 0.3% compared to 0.2%, was accounted for, and the association between PGS and 25(OH)D  
415 was stronger ( $p=0.0545$  vs  $0.15$ ) using the PGS developed in the full sample (n=1,099). Additionally,  
416 variance accounted for dropped to 0.14% (compared to 0.31%) and the PGS-25(OH)D association  
417 became non-significant ( $p=0.19$ ) when using mismatched summary statistics, reiterating the importance  
418 of ancestry-specific analyses.

419 Not surprisingly, the heritability investigation provided further evidence that PGSs using a less  
420 stringent p-value threshold account for a higher portion of the heritability than genome-wide significant  
421 SNPs from previous GWAS. Here, the PGS explained more of the SNP heritability than did previous  
422 GWAS findings, 17.1% compared to 6.9% in those of European ancestry (sample size was too small for  
423 PGS heritability calculations in those of African ancestry). However, neither the PGS nor previous GWAS  
424 findings explain a large portion of total SNP heritability, promoting the need for genetic studies with larger  
425 sample sizes and more dense SNP data that include low frequency variants to fully understand the  
426 genetic determinants of 25(OH)D concentrations and, therefore, inform the most effective vitamin D  
427 supplementation practices.

428 This study calculated a PGS with a moderate  $R^2$ , a consistent relationship to 25(OH)D  
429 concentrations and that explained more heritability of 25(OH)D than previous GWAS findings, reiterating  
430 the importance of capturing genetic risk by PGS which can be used for clinical predictions. Additionally,  
431 this study contributes in-depth multi-ethnic investigation into 25(OH)D heritability by ancestry, teasing  
432 apart genetic underpinnings of 25(OH)D concentrations. However, the study does come with some  
433 limitations. To maintain independence from TRANSCEN-D, which provided ancestry-specific weights for  
434 the PGSs, the sample size used in this analysis was relatively small, especially for the African-ancestry



435 cohort. The sample size issues experienced for the African-ancestry cohort emphasize the importance of  
436 obtaining more diverse samples (i.e. in initiatives like All of Us) (74). Through the TRANSCEN-D GWAS  
437 meta-analysis and the analysis here, nearly all of the publicly available African-ancestry samples with  
438 relevant data have been exhausted and sample sizes for other racial/ethnic groups remain limited. The  
439 limited amount of diverse data led to a small African-ancestry training set. A small training set limits  
440 discrimination of risk groups which could explain the less significant findings for those of African ancestry  
441 (42). Furthermore, the genotyping performed did not capture rare variants, limiting the variance that could  
442 be captured by the PGS. While GCTA allows for the calculation of heritability in non-related participants,  
443 which avoids overestimation due to shared environment, it only accounts for additive SNP effects,  
444 potentially underestimating total heritability which also could include gene-by-gene interactions. Finally,  
445 while adjusting for available UV radiation is more precise than season, it is not a perfect proxy for time  
446 spent outside and does not consider the amount of skin exposed, sunscreen use or skin pigmentation.  
447 These limitations leave room for future studies and replication that should be performed. For example,  
448 future PGSs could be developed implementing the recent cross-prediction method developed by Mak  
449 et,al; this method allows and corrects for overlap between the base and target dataset that would have  
450 allowed for a much larger African-ancestry sample (75). Additionally, in the future, the PGS could be  
451 utilized as an independent variable to predict health outcomes.

452  
453 **Conclusion**

454  
455 This study showed that PGSs are a powerful predictive tool for determining 25(OH)D  
456 concentrations. Given the association between the optimal PGS and 25(OH)D concentrations, PGSs  
457 could be leveraged for personalized vitamin D supplementation, which could prevent the negative  
458 downstream effects of 25(OH)D inadequacy. Additionally, through an in-depth investigation of 25(OH)D  
459 SNP heritability, it was shown that the PGS explains more heritability than do GWAS findings to date.  
460 This provides additional evidence that many SNPs that function through small effect sizes influence  
461 25(OH)D concentrations, yielding further understanding of the genetic architecture of 25(OH)D. However  
462 much of the heritability remains to be explained, therefore, more research is warranted along the quest to  
463 effectively and efficiently preventing 25(OH)D inadequacy through personalized supplementation.



464 **Appendix**

465 **Acknowledgments**

466

467 We thank the researchers and participants of Atherosclerosis in Communities (ARIC), Multi-Ethnic Study  
468 of Atherosclerosis and the Women's Health Initiative (WHI) for making this data publicly available.

469

470 ARIC

471 The Atherosclerosis Risk in Communities Study is carried out as a collaborative study supported by  
472 National Heart, Lung, and Blood Institute contracts (HHSN268201100005C, HHSN268201100006C,  
473 HHSN268201100007C, HHSN268201100008C, HHSN268201100009C, HHSN268201100010C,  
474 HHSN268201100011C, and HHSN268201100012C). The authors thank the staff and participants of the  
475 ARIC study for their important contributions.

476

477 Funding for GENEVA was provided by National Human Genome Research Institute grant U01HG004402  
478 (E. Boerwinkle). Vitamin D assays in ARIC were funded by R01 HL103706 (P. Lutsey).

479

480 MESA

481 MESA and the MESA SHARe project are conducted and supported by the National Heart, Lung, and  
482 Blood Institute (NHLBI) in collaboration with MESA investigators. Support for MESA is provided by  
483 contracts HHSN268201500003I, N01-HC-95159, N01-HC-95160, N01-HC-95161, N01-HC-95162, N01-  
484 HC-95163, N01-HC-95164, N01-HC-95165, N01-HC-95166, N01-HC-95167, N01-HC-95168, N01-HC-  
485 95169, UL1-TR-000040, UL1-TR-001079, UL1-TR-001420, UL1-TR-001881, and DK063491.

486

487 The MESA CARE data used for the analyses described in this manuscript were obtained through  
488 Genetics (accession numbers). Funding for CARE genotyping was provided by NHLBI Contract N01-HC-  
489 65226.

490 Funding support for the Vitamin D dataset was provided by grant HL096875

491

492 WHI

493 The WHI program is funded by the National Heart, Lung, and Blood Institute, National Institutes of Health,  
494 U.S. Department of Health and Human Services through contracts HHSN268201600018C,  
495 HHSN268201600001C, HHSN268201600002C, HHSN268201600003C, and HHSN268201600004C.  
496 This manuscript was not prepared in collaboration with investigators of the WHI, has not been reviewed  
497 and/or approved by the Women's Health Initiative (WHI), and does not necessarily reflect the opinions of  
498 the WHI investigators or the NHLBI.

499

500 WHI PAGE is funded through the NHGRI Population Architecture Using Genomics and Epidemiology  
501 (PAGE) network (Grant Number U01 HG004790). Assistance with phenotype harmonization, SNP  
502 selection, data cleaning, meta-analyses, data management and dissemination, and general study  
503 coordination, was provided by the PAGE Coordinating Center (U01HG004801-01).

504

505 Funding support for WHI GARNET was provided through the NHGRI Genomics and Randomized Trials  
506 Network (GARNET) (Grant Number U01 HG005152). Assistance with phenotype harmonization and  
507 genotype cleaning, as well as with general study coordination, was provided by the GARNET  
508 Coordinating Center (U01 HG005157). Assistance with data cleaning was provided by the National  
509 Center for Biotechnology Information. Funding support for genotyping, which was performed at the Broad  
510 Institute of MIT and Harvard, was provided by the NIH Genes, Environment and Health Initiative [GEI]  
511 (U01 HG004424).

512 The datasets used for the analyses described in this manuscript were obtained from dbGaP at  
513 <http://www.ncbi.nlm.nih.gov/sites/entrez?db=gap> through dbGaP accession phs000200.v11.p3.

514

515 Funding for WHI SHARe genotyping was provided by NHLBI Contract N02- HL-64278.

516

517 KEH was supported by an NLM training grant to the Computation and Informatics in Biology and Medicine  
518 Training Program (NLM 5T15LM007359). Computational resources were supported by a core grant to the  
519 Center for Demography and Ecology at the University of Wisconsin-Madison (P2C HD047873).

520

521 **References**

- 522 1. Wang TJ, Zhang F, Richards JB, Kestenbaum B, van Meurs JB, Berry D, Kiel D, Streeten EA,  
523 Ohlsson C, Koller DL, Palotie L, Cooper JD, O'Reilly PF, Houston DK, Glazer NL, Vandenput L,  
524 Peacock M, Shi J, Rivadeneira F, McCarthy MI, Anneli P, de Boer IH, Mangino M, Kato B, Smyth  
525 DJ, Booth SL, Jacques PF, Burke GL, Goodarzi M, Cheung C-L, Wolf M, Rice K, Goltzman D,  
526 Hidiroglou N, Ladouceur M, Hui SL, Wareham NJ, Hocking LJ, Hart D, Arden NK, Cooper C,  
527 Malik S, Fraser WD, Hartikainen A-L, Zhai G, Macdonald H, Forouhi NG, Loos RJF, Reid DM,  
528 Hakim A, Dennison E, Liu Y, Power C, Stevens HE, Jaana L, Vasani RS, Soranzo N, Bojunga J,  
529 Psaty BM, Lorentzon M, Foroud T, Harris TB, Hofman A, Jansson J-O, Cauley JA, Uitterlinden  
530 AG, Gibson Q, Järvelin M-R, Karasik D, Siscovick DS, Econs MJ, Kritchevsky SB, Florez JC,  
531 Todd JA, Dupuis J, Hyppönen E, Spector TD. Common genetic determinants of vitamin D  
532 insufficiency: a genome-wide association study. *Lancet* 2010; 376:180-188
- 533 2. Forrest KYZ, Stuhldreher WL. Prevalence and correlates of vitamin D deficiency in US adults.  
534 *Nutrition Research* 31:48-54
- 535 3. Medicine Io. Dietary Reference Intakes for Calcium and Vitamin D. Washington, DC: The National  
536 Academies Press.
- 537 4. Holick MF. High Prevalence of Vitamin D Inadequacy and Implications for Health. *Mayo Clinic*  
538 *Proceedings* 81:353-373
- 539 5. Holick MF. Vitamin D Deficiency. *New England Journal of Medicine* 2007; 357:266-281
- 540 6. Mirhosseini N, Vatanparast H, Kimball SM. The Association between Serum 25(OH)D Status and  
541 Blood Pressure in Participants of a Community-Based Program Taking Vitamin D Supplements.  
542 *Nutrients* 2017; 9:1244
- 543 7. Arshi S, Fallahpour M, Nabavi M, Bermanian MH, Javad-Mousavi SA, Nojomi M, Esmaeilzadeh H,  
544 Molatefi R, Rezaei M, Jalali F, Akbarpour N. The effects of vitamin D supplementation on airway  
545 functions in mild to moderate persistent asthma. *Annals of Allergy, Asthma & Immunology* 2014;  
546 113:404-409
- 547 8. Song T-J, Chu M-K, Sohn J-H, Ahn H-Y, Lee SH, Cho S-J. Effect of Vitamin D Deficiency on the  
548 Frequency of Headaches in Migraine. *Journal of Clinical Neurology (Seoul, Korea)* 2018; 14:366-  
549 373
- 550 9. Kheiri B, Abdalla A, Osman M, Ahmed S, Hassan M, Bachuwa G. Vitamin D deficiency and risk of  
551 cardiovascular diseases: a narrative review. *Clinical Hypertension* 2018; 24:9
- 552 10. Kunutsor SK, Burgess S, Munroe PB, Khan H. Vitamin D and high blood pressure: causal  
553 association or epiphenomenon? *European Journal of Epidemiology* 2014; 29:1-14
- 554 11. Afzal S, Brøndum-Jacobsen P, Bojesen SE, Nordestgaard BG. Genetically low vitamin D  
555 concentrations and increased mortality: mendelian randomisation analysis in three large cohorts.  
556 *BMJ* 2014; 349
- 557 12. Mokry LE, Ross S, Ahmad OS, Forgetta V, Smith GD, Leong A, Greenwood CMT, Thanassoulis  
558 G, Richards JB. Vitamin D and Risk of Multiple Sclerosis: A Mendelian Randomization Study.  
559 *PLoS Med* 2015; 12:e1001866
- 560 13. Ong J-S, Cuellar-Partida G, Lu Y, Fasching PA, Hein A, Burghaus S, Beckmann MW,  
561 Lambrechts D, Van Nieuwenhuysen E, Vergote I, Vanderstichele A, Anne Doherty J, Anne  
562 Rossing M, Chang-Claude J, Eilber U, Rudolph A, Wang-Gohrke S, Goodman MT, Bogdanova N,  
563 Dörk T, Dürst M, Hillemanns P, Runnebaum IB, Antonenkova N, Butzow R, Leminen A,  
564 Nevanlinna H, Pelttari LM, Edwards RP, Kelley JL, Modugno F, Moysich KB, Ness RB, Cannioto  
565 R, Høgdall E, Høgdall CK, Jensen A, Giles GG, Bruinsma F, Kjaer SK, Hildebrandt MAT, Liang  
566 D, Lu KH, Wu X, Bisogna M, Dao F, Levine DA, Cramer DW, Terry KL, Tworoger SS, Stampfer  
567 M, Missmer S, Bjorge L, Salvesen HB, Kopperud RK, Bischof K, Aben KKH, Kiemeny LA,  
568 Massuger LFAG, Brooks-Wilson A, Olson SH, McGuire V, Rothstein JH, Sieh W, Whittemore AS,  
569 Cook LS, Le ND, Gilks CB, Gronwald J, Jakubowska A, Lubiński J, Kluz T, Song H, Tyrer JP,  
570 Wentzensen N, Brinton L, Trabert B, Lissowska J, McLaughlin JR, Narod SA, Phelan C, Anton-  
571 Culver H, Ziogas A, Eccles D, Campbell I, Gayther SA, Gentry-Maharaj A, Menon U, Ramus SJ,  
572 Wu AH, Dansonka-Mieszkowska A, Kupryjanczyk J, Timorek A, Szafron L, Cunningham JM,  
573 Fridley BL, Winham SJ, Bandera EV, Poole EM, Morgan TK, Risch HA, Goode EL, Schildkraut  
574 JM, Pearce CL, Berchuck A, Pharoah PDP, Chenevix-Trench G, Gharahkhani P, Neale RE,

- 575 Webb PM, MacGregor S. Association of vitamin D levels and risk of ovarian cancer: a Mendelian  
576 randomization study. *International Journal of Epidemiology* 2016; 45:1619-1630
- 577 **14.** Vimalleswaran KS, Cavadino A, Berry DJ, LifeLines Cohort Study i, Jorde R, Dieffenbach AK, Lu  
578 C, Alves AC, Heerspink HJL, Tikkanen E, Eriksson J, Wong A, Mangino M, Jablonski KA, Nolte  
579 IM, Houston DK, Ahluwalia TS, van der Most PJ, Pasko D, Zgaga L, Thiering E, Vitart V, Fraser  
580 RM, Huffman JE, de Boer RA, Schöttker B, Saum K-U, McCarthy MI, Dupuis J, Herzig K-H,  
581 Sebert S, Pouta A, Laitinen J, Kleber ME, Navis G, Lorentzon M, Jameson K, Arden N, Cooper  
582 JA, Acharya J, Hardy R, Raitakari O, Ripatti S, Billings LK, Lahti J, Osmond C, Penninx BW,  
583 Rejnmark L, Lohman KK, Paternoster L, Stolk RP, Hernandez DG, Byberg L, Hagström E,  
584 Melhus H, Ingelsson E, Mellström D, Ljunggren Ö, Tzoulaki I, McLachlan S, Theodoratou E,  
585 Tiesler CMT, Jula A, Navarro P, Wright AF, Polasek O, International Consortium for Blood  
586 Pressure CfH, Aging Research in Genomic Epidemiology consortium GBPgc, Hayward C, Wilson  
587 JF, Rudan I, Salomaa V, Heinrich J, Campbell H, Price JF, Karlsson M, Lind L, Michaëlsson K,  
588 Bandinelli S, Frayling TM, Hartman CA, Sørensen TIA, Kritchevsky SB, Langdahl BL, Eriksson  
589 JG, Florez JC, Spector TD, Lehtimäki T, Kuh D, Humphries SE, Cooper C, Ohlsson C, März W,  
590 de Borst MH, Kumari M, Kivimäki M, Wang TJ, Power C, Brenner H, Grimnes G, van der Harst P,  
591 Snieder H, Hingorani AD, Pilz S, Whittaker JC, Järvelin M-R, Hyppönen E. Association of vitamin  
592 D status with arterial blood pressure and hypertension risk: a mendelian randomisation study.  
593 *The lancet Diabetes & endocrinology* 2014; 2:719-729
- 594 **15.** Kueider AM, Tanaka T, An Y, Kitner-Triolo MH, Palchamy E, Ferrucci L, Thambisetty M. State-  
595 and trait-dependent associations of vitamin-D with brain function during aging. *Neurobiology of*  
596 *Aging* 2016; 39:38-45
- 597 **16.** Vimalleswaran KS, Berry DJ, Lu C, Tikkanen E, Pilz S, Hiraki LT, Cooper JD, Dastani Z, Li R,  
598 Houston DK, Wood AR, Michaëlsson K, Vandenput L, Zgaga L, Yerges-Armstrong LM, McCarthy  
599 MI, Dupuis J, Kaakinen M, Kleber ME, Jameson K, Arden N, Raitakari O, Viikari J, Lohman KK,  
600 Ferrucci L, Melhus H, Ingelsson E, Byberg L, Lind L, Lorentzon M, Salomaa V, Campbell H,  
601 Dunlop M, Mitchell BD, Herzig K-H, Pouta A, Hartikainen A-L, the Genetic Investigation of  
602 Anthropometric Traits c, Streeten EA, Theodoratou E, Jula A, Wareham NJ, Ohlsson C, Frayling  
603 TM, Kritchevsky SB, Spector TD, Richards JB, Lehtimäki T, Ouwehand WH, Kraft P, Cooper C,  
604 März W, Power C, Loos RJF, Wang TJ, Järvelin M-R, Whittaker JC, Hingorani AD, Hyppönen E.  
605 Causal Relationship between Obesity and Vitamin D Status: Bi-Directional Mendelian  
606 Randomization Analysis of Multiple Cohorts. *PLoS Medicine* 2013; 10:e1001383
- 607 **17.** Boonen S, Lips P, Bouillon R, Bischoff-Ferrari HA, Vanderschueren D, Haentjens P. Need for  
608 Additional Calcium to Reduce the Risk of Hip Fracture with Vitamin D Supplementation: Evidence  
609 from a Comparative Metaanalysis of Randomized Controlled Trials. *The Journal of Clinical*  
610 *Endocrinology & Metabolism* 2007; 92:1415-1423
- 611 **18.** Schnatz PF, Jiang X, Aragaki AK, Nudy M, O'Sullivan DM, Williams M, LeBlanc ES, Martin LW,  
612 Manson JE, Shikany JM, Johnson KC, Stefanick ML, Payne ME, Cauley JA, Howard BV, Robbins  
613 J. Effects of Calcium, Vitamin D, and Hormone Therapy on Cardiovascular Disease Risk Factors  
614 in the Women's Health Initiative: A Randomized Controlled Trial. *Obstetrics and gynecology*  
615 2017; 129:121-129
- 616 **19.** Lappe JM, Travers-Gustafson D, Davies KM, Recker RR, Heaney RP. Vitamin D and calcium  
617 supplementation reduces cancer risk: results of a randomized trial. *The American Journal of*  
618 *Clinical Nutrition* 2007; 85:1586-1591
- 619 **20.** Jorde R, Sneve M, Figenschau Y, Svartberg J, Waterloo K. Effects of vitamin D supplementation  
620 on symptoms of depression in overweight and obese subjects: randomized double blind trial.  
621 *Journal of Internal Medicine* 2008; 264:599-609
- 622 **21.** Bertone-Johnson ER, Powers SI, Spangler L, Brunner RL, Michael YL, Larson JC, Millen AE,  
623 Bueche MN, Salmoirago-Blotcher E, Liu S, Wassertheil-Smoller S, Ockene JK, Ockene I, Manson  
624 JE. Vitamin D intake from foods and supplements and depressive symptoms in a diverse  
625 population of older women. *The American Journal of Clinical Nutrition* 2011; 94:1104-1112
- 626 **22.** Pincikova T, Paquin-Proulx D, Sandberg JK, Flodström-Tullberg M, Hjelte L. Clinical impact of  
627 vitamin D treatment in cystic fibrosis: a pilot randomized, controlled trial. *European Journal Of*  
628 *Clinical Nutrition* 2016; 71:203

- 629 23. Barry EL, Peacock JL, Rees JR, Bostick RM, Robertson DJ, Bresalier RS, Baron JA. Vitamin D  
630 Receptor Genotype, Vitamin D(3) Supplementation, and Risk of Colorectal Adenomas: A  
631 Randomized Clinical Trial. *JAMA oncology* 2017; 3:628-635
- 632 24. Weaver CM, Alexander DD, Boushey CJ, Dawson-Hughes B, Lappe JM, LeBoff MS, Liu S,  
633 Looker AC, Wallace TC, Wang DD. Calcium plus vitamin D supplementation and risk of fractures:  
634 an updated meta-analysis from the National Osteoporosis Foundation. *Osteoporosis International*  
635 2016; 27:367-376
- 636 25. Bischoff-Ferrari HA, Willett WC, Wong JB, Giovannucci E, Dietrich T, Dawson-Hughes B.  
637 Fracture prevention with vitamin d supplementation: A meta-analysis of randomized controlled  
638 trials. *JAMA* 2005; 293:2257-2264
- 639 26. Manson JE, Cook NR, Lee IM, Christen W, Bassuk SS, Mora S, Gibson H, Gordon D, Copeland  
640 T, D'Agostino D, Friedenberg G, Ridge C, Bubes V, Giovannucci EL, Willett WC, Buring JE.  
641 Vitamin D Supplements and Prevention of Cancer and Cardiovascular Disease. *New England*  
642 *Journal of Medicine* 2018;
- 643 27. Melamed ML, Manson JE. Vitamin D and cardiovascular disease and cancer: not too much and  
644 not too little? The need for clinical trials. *Women's health (London, England)* 2011; 7:419-424
- 645 28. Aloia JF, Patel M, DiMaano R, Li-Ng M, Talwar SA, Mikhail M, Pollack S, Yeh JK. Vitamin D  
646 intake to attain a desired serum 25-hydroxyvitamin D concentration. *The American Journal of*  
647 *Clinical Nutrition* 2008; 87:1952-1958
- 648 29. Binkley N, Lappe J, Singh RJ, Khosla S, Krueger D, Drezner MK, Blank RD. Can vitamin D  
649 metabolite measurements facilitate a "treat-to-target" paradigm to guide vitamin D  
650 supplementation? *Osteoporosis international : a journal established as result of cooperation*  
651 *between the European Foundation for Osteoporosis and the National Osteoporosis Foundation of*  
652 *the USA* 2015; 26:1655-1660
- 653 30. Nimitphong H, Saetung S, Chanprasertyotin S, Chailurkit L-o, Ongphiphadhanakul B. Changes in  
654 circulating 25-hydroxyvitamin D according to vitamin D binding protein genotypes after vitamin D3  
655 or D2supplementation. *Nutrition Journal* 2013; 12:39
- 656 31. Engelman CD, Fingerlin TE, Langefeld CD, Hicks PJ, Rich SS, Wagenknecht LE, Bowden DW,  
657 Norris JM. Genetic and environmental determinants of 25-hydroxyvitamin D and 1,25-  
658 dihydroxyvitamin D levels in Hispanic and African Americans. *J Clin Endocrinol Metab* 2008; 93
- 659 32. Engelman CD, Meyers KJ, Iyengar SK, Liu Z, Karki CK, Igo RP, Truitt B, Robinson J, Sarto GE,  
660 Wallace R, Blodi BA, Klein ML, Tinker L, LeBlanc ES, Jackson RD, Song Y, Manson JE, Mares  
661 JA, Millen AE. Vitamin D Intake and Season Modify the Effects of the GC and CYP2R1 Genes on  
662 25-Hydroxyvitamin D Concentrations. *The Journal of Nutrition* 2013; 143:17-26
- 663 33. Wjst M. Linking vitamin D, the microbiome and allergy. *Allergy* 2017; 72:329-330
- 664 34. Ahn J, Yu K, Stolzenberg-Solomon R, Simon KC, McCullough ML, Gallicchio L, Jacobs EJ,  
665 Ascherio A, Helzlsouer K, Jacobs KB, Li Q, Weinstein SJ, Purdue M, Virtamo J, Horst R, Wheeler  
666 W, Chanock S, Hunter DJ, Hayes RB, Kraft P, Albanes D. Genome-wide association study of  
667 circulating vitamin D levels. *Human Molecular Genetics* 2010; 19:2739-2745
- 668 35. Engelman CD, Meyers KJ, Ziegler JT, Taylor KD, Palmer ND, Haffner SM, Fingerlin TE,  
669 Wagenknecht LE, Rotter JI, Bowden DW, Langefeld CD, Norris JM. Genome-wide association  
670 study of vitamin D concentrations in Hispanic Americans: The IRAS Family Study. *The Journal of*  
671 *steroid biochemistry and molecular biology* 2010; 122:186-192
- 672 36. Jiang X, O'Reilly PF, Aschard H, Hsu Y-H, Richards JB, Dupuis J, Ingelsson E, Karasik D, Pilz S,  
673 Berry D, Kestenbaum B, Zheng J, Luan J, Sofianopoulou E, Streeten EA, Albanes D, Lutsey PL,  
674 Yao L, Tang W, Econs MJ, Wallaschofski H, Völzke H, Zhou A, Power C, McCarthy MI, Michos  
675 ED, Boerwinkle E, Weinstein SJ, Freedman ND, Huang W-Y, Van Schoor NM, van der Velde N,  
676 Groot LCPGMd, Enneman A, Cupples LA, Booth SL, Vasani RS, Liu C-T, Zhou Y, Ripatti S,  
677 Ohlsson C, Vandenput L, Lorentzon M, Eriksson JG, Shea MK, Houston DK, Kritchevsky SB, Liu  
678 Y, Lohman KK, Ferrucci L, Peacock M, Gieger C, Beekman M, Slagboom E, Deelen J, Heemst  
679 Dv, Kleber ME, März W, de Boer IH, Wood AC, Rotter JI, Rich SS, Robinson-Cohen C, den  
680 Heijer M, Jarvelin M-R, Cavadino A, Joshi PK, Wilson JF, Hayward C, Lind L, Michaëlsson K,  
681 Trompet S, Zillikens MC, Uitterlinden AG, Rivadeneira F, Broer L, Zgaga L, Campbell H,  
682 Theodoratou E, Farrington SM, Timofeeva M, Dunlop MG, Valdes AM, Tikkanen E, Lehtimäki T,  
683 Lyytikäinen L-P, Kähönen M, Raitakari OT, Mikkilä V, Ikram MA, Sattar N, Jukema JW, Wareham  
684 NJ, Langenberg C, Forouhi NG, Gundersen TE, Khaw K-T, Butterworth AS, Danesh J, Spector T,



- 685 Wang TJ, Hyppönen E, Kraft P, Kiel DP. Genome-wide association study in 79,366 European-  
686 ancestry individuals informs the genetic architecture of 25-hydroxyvitamin D levels. *Nature*  
687 *Communications* 2018; 9:260
- 688 37. Hong J, Hatchell KE, Bradfield JP, Andrew B, Alessandra C, Chao-Qiang L, Langefeld CD, Lu L,  
689 Lu Y, Lutsey PL, Musani SK, Nalls MA, Robinson-Cohen C, Roizen JD, Saxena R, Tucker KL,  
690 Ziegler JT, Arking DE, Bis JC, Boerwinkle E, Bottinger EP, Bowden DW, Gilsanz V, Houston DK,  
691 Kalkwarf HJ, Kelly A, Lappe JM, Liu Y, Michos ED, Oberfield SE, Palmer ND, Rotter JI, Sapkota  
692 B, Shepherd JA, Wilson JG, Basu S, de Boer IH, Divers J, Freedman BI, Grant SFA, Hakanarson  
693 H, Harris TB, Kestenbaum BR, Kritchevsky SB, Loos RJF, Norris JM, Norwood AF, Ordovas JM,  
694 Pankow JS, Psaty BM, Sanhgera DK, Wagenknecht LE, Zemel BS, Meigs J, Dupuis J, Florez JC,  
695 Wang T, Liu C-T, Engelman CD, Billings LK. Trans-ethnic Evaluation Identifies Novel Low  
696 Frequency Loci Associated with 25-Hydroxyvitamin D Concentrations. *The Journal of Clinical*  
697 *Endocrinology & Metabolism* 2018;jc.2017-01802-jc.02017-01802
- 698 38. Manolio TA, Collins FS, Cox NJ, Goldstein DB, Hindorf LA, Hunter DJ, McCarthy MI, Ramos EM,  
699 Cardon LR, Chakravarti A. Finding the missing heritability of complex diseases. *Nature* 2009; 461
- 700 39. Mormino EC, Sperling RA, Holmes AJ, Buckner RL, De Jager PL, Smoller JW, Sabuncu MR,  
701 Alzheimer's Dis Neuroimaging I. Polygenic risk of Alzheimer disease is associated with early- and  
702 late-life processes. *Neurology* 2016; 87:481-488
- 703 40. Desikan RS, Fan CC, Wang Y, Schork AJ, Cabral HJ, Cupples LA, Thompson WK, Besser L,  
704 Kukull WA, Holland D, Chen C-H, Brewer JB, Karow DS, Kauppi K, Witoelar A, Karch CM,  
705 Bonham LW, Yokoyama JS, Rosen HJ, Miller BL, Dillon WP, Wilson DM, Hess CP, Pericak-  
706 Vance M, Haines JL, Farrer LA, Mayeux R, Hardy J, Goate AM, Hyman BT, Schellenberg GD,  
707 McEvoy LK, Andreassen OA, Dale AM. Genetic assessment of age-associated Alzheimer  
708 disease risk: Development and validation of a polygenic hazard score. *PLoS Medicine* 2017;  
709 14:e1002258
- 710 41. Tang W, Schwienbacher C, Lopez Lorna M, Ben-Shlomo Y, Oudot-Mellakh T, Johnson  
711 Andrew D, Samani Nilesh J, Basu S, Gögele M, Davies G, Lowe Gordon D, Tregouet D-A, Tan A,  
712 Pankow James S, Tenesa A, Levy D, Volpato Claudia B, Rumley A, Gow Alan J, Minelli C,  
713 Yarnell John W, Porteous David J, Starr John M, Gallacher J, Boerwinkle E, Visscher Peter M,  
714 Pramstaller Peter P, Cushman M, Emilsson V, Plump Andrew S, Matijevic N, Morange P-E,  
715 Deary Ian J, Hicks Andrew A, Folsom Aaron R. Genetic Associations for Activated Partial  
716 Thromboplastin Time and Prothrombin Time, their Gene Expression Profiles, and Risk of  
717 Coronary Artery Disease. *American Journal of Human Genetics* 2012; 91:152-162
- 718 42. Dudbridge F. Power and Predictive Accuracy of Polygenic Risk Scores. *PLOS Genetics* 2013;  
719 9:e1003348
- 720 43. Euesden J, Lewis CM, O'Reilly PF. PRSice: Polygenic Risk Score software. *Bioinformatics* 2015;  
721 31:1466-1468
- 722 44. Nissen J, Rasmussen LB, Ravn-Haren G, Andersen EW, Hansen B, Andersen R, Mejbom H,  
723 Madsen KH, Vogel U. Common Variants in CYP2R1 and GC Genes Predict Vitamin D  
724 Concentrations in Healthy Danish Children and Adults. *PLOS ONE* 2014; 9:e89907
- 725 45. Shao B, Jiang S, Muyiduli X, Wang S, Mo M, Li M, Wang Z, Yu Y. Vitamin D pathway gene  
726 polymorphisms influenced vitamin D level among pregnant women. *Clinical Nutrition*
- 727 46. Zhang Z, He J-W, Fu W-Z, Zhang C-Q, Zhang Z-L. An analysis of the association between the  
728 vitamin D pathway and serum 25-hydroxyvitamin D levels in a healthy Chinese population.  
729 *Journal of Bone and Mineral Research* 2013; 28:1784-1792
- 730 47. Chandler PD, Tobias DK, Wang L, Smith-Warner SA, Chasman DI, Rose L, Giovannucci EL,  
731 Buring JE, Ridker PM, Cook NR, Manson JE, Sesso HD. Association between Vitamin D Genetic  
732 Risk Score and Cancer Risk in a Large Cohort of U.S. Women. *Nutrients* 2018; 10:55
- 733 48. Mazahery H, von Hurst PR. Factors Affecting 25-Hydroxyvitamin D Concentration in Response to  
734 Vitamin D Supplementation. *Nutrients* 2015; 7:5111-5142
- 735 49. Didriksen A, Grimnes G, Hutchinson M, Kjærgaard M, Svartberg J, Joakimsen R, Jorde R. The  
736 serum 25-hydroxyvitamin D response to vitamin D supplementation is related to genetic factors,  
737 BMI, and Baseline levels. Vol 169.
- 738 50. INVESTIGATORS TA. THE ATHEROSCLEROSIS RISK IN COMMUNIT (ARIC) STUIY):  
739 DESIGN AND OBJECTWES. *American Journal of Epidemiology* 1989; 129:687-702

- 740 51. Anderson GL, Manson J, Wallace R, Lund B, Hall D, Davis S, Shumaker S, Wang C-Y, Stein E,  
741 Prentice RL. Implementation of the women's health initiative study design. *Annals of*  
742 *Epidemiology* 2003; 13:S5-S17
- 743 52. Kwak SK, Kim JH. Statistical data preparation: management of missing values and outliers.  
744 *Korean Journal of Anesthesiology* 2017; 70:407-411
- 745 53. Cornelis MC, Agrawal A, Cole JW, Hansel NN, Barnes KC, Beaty TH, Bennett SN, Bierut LJ,  
746 Boerwinkle E, Doherty KF, Feenstra B, Feingold E, Fornage M, Haiman CA, Harris EL, Hayes  
747 MG, Heit JA, Hu FB, Kang JH, Laurie CC, Ling H, Manolio TA, Marazita ML, Mathias RA, Mirel  
748 DB, Paschall J, Pasquale LR, Pugh EW, Rice JP, Udren J, van Dam RM, Wang X, Wiggs JL,  
749 Williams K, Yu K. The Gene, Environment Association Studies Consortium (GENEVA):  
750 Maximizing the Knowledge Obtained from GWAS by Collaboration Across Studies of Multiple  
751 Conditions. *Genetic epidemiology* 2010; 34:364-372
- 752 54. Musunuru K, Lettre G, Young T, Farlow DN, Pirruccello JP, Ejebe KG, Keating BJ, Yang Q, Chen  
753 M-H, Lapchuk N, Crenshaw A, Ziaugra L, Rachupka A, Benjamin EJ, Cupples LA, Fornage M,  
754 Fox ER, Heckbert SR, Hirschhorn JN, Newton-Cheh CH, Nizzari MM, Paltoo DN, Papanicolaou  
755 GJ, Patel SR, Psaty BM, Rader DJ, Redline S, Rich SS, Rotter JI, Taylor HA, Tracy RP, Vasani  
756 RS, Wilson JG, Kathiresan S, Fabsitz RR, Boerwinkle E, Gabriel SB. Candidate Gene  
757 Association Resource (CARE): Design, Methods, and Proof of Concept. *Circulation*  
758 *Cardiovascular genetics* 2010; 3:267-275
- 759 55. Manichaikul A, Palmas W, Rodriguez CJ, Peralta CA, Divers J, Guo X, Chen W-M, Wong Q,  
760 Williams K, Kerr KF, Taylor KD, Tsai MY, Goodarzi MO, Sale MM, Diez-Roux AV, Rich SS, Rotter  
761 JI, Mychaleckyj JC. Population Structure of Hispanics in the United States: The Multi-Ethnic  
762 Study of Atherosclerosis. *PLoS Genetics* 2012; 8:e1002640
- 763 56. Matise TC, Ambite JL, Buyske S, Carlson CS, Cole SA, Crawford DC, Haiman CA, Heiss G,  
764 Kooperberg C, Marchand LL, Manolio TA, North KE, Peters U, Ritchie MD, Hindorf LA, Haines  
765 JL. The Next PAGE in Understanding Complex Traits: Design for the Analysis of Population  
766 Architecture Using Genetics and Epidemiology (PAGE) Study. *American Journal of Epidemiology*  
767 2011; 174:849-859
- 768 57. Anderson G. WHI Harmonized and Imputed GWAS Data dbGaP Study Accession:  
769 phs000746.v2.p3. Accessed April 3, 2018.
- 770 58. Das S, Forer L, Schonherr S, Sidore C, Locke AE, Kwong A, Vrieze SI, Chew EY, Levy S, McGue  
771 M, Schlessinger D, Stambolian D, Loh P-R, Iacono WG, Swaroop A, Scott LJ, Cucca F,  
772 Kronenberg F, Boehnke M, Abecasis GR, Fuchsberger C. Next-generation genotype imputation  
773 service and methods. *Nat Genet* 2016; 48:1284-1287
- 774 59. Loh P-R, Danecek P, Palamara PF, Fuchsberger C, Reshef YA, Finucane HK, Schoenherr S,  
775 Forer L, McCarthy S, Abecasis GR, Durbin R, Price AL. Reference-based phasing using the  
776 Haplotype Reference Consortium panel. *Nature genetics* 2016; 48:1443-1448
- 777 60. Johnston HR, Hu Y-J, Gao J, O'Connor TD, Abecasis GR, Wojcik GL, Gignoux CR, Gourraud P-  
778 A, Lizee A, Hansen M, Genuario R, Bullis D, Lawley C, Kenny EE, Bustamante C, Beaty TH,  
779 Mathias RA, Barnes KC, Qin ZS, Consortium C. Identifying tagging SNPs for African specific  
780 genetic variation from the African Diaspora Genome. *Scientific Reports* 2017; 7:46398
- 781 61. Danecek P, Auton A, Abecasis G, Albers CA, Banks E, DePristo MA, Handsaker RE, Lunter G,  
782 Marth GT, Sherry ST, McVean G, Durbin R. The variant call format and VCFtools. *Bioinformatics*  
783 2011; 27:2156-2158
- 784 62. Purcell S, Neale B, Todd-Brown K, Thomas L, Ferreira MAR, Bender D, Maller J, Sklar P, de  
785 Bakker PIW, Daly MJ, Sham PC. PLINK: a tool set for whole-genome association and population-  
786 based linkage analyses. *American journal of human genetics* 2007; 81:559-575
- 787 63. The Genomes Project C, McVean GA, Altshuler DM, Durbin RM, Abecasis GR, Bentley DR,  
788 Chakravarti A, Clark AG, Donnelly P, Eichler EE, Flicek P, Gabriel SB, Gibbs RA, Green ED,  
789 Hurles ME, Knoppers BM, Korbel JO, Lander ES, Lee C, Lehrach H, Mardis ER, Marth GT,  
790 McVean GA, Nickerson DA, Schmidt JP, Sherry ST, Wang J, Wilson RK, Gibbs RA, Dinh H,  
791 Kovar C, Lee S, Lewis L, Muzny D, Reid J, Wang M, Wang J, Fang X, Guo X, Jian M, Jiang H,  
792 Jin X, Li G, Li J, Li Y, Li Z, Liu X, Lu Y, Ma X, Su Z, Tai S, Tang M, Wang B, Wang G, Wu H, Wu  
793 R, Yin Y, Zhang W, Zhao J, Zhao M, Zheng X, Zhou Y, Lander ES, Altshuler DM, Gabriel SB,  
794 Gupta N, Flicek P, Clarke L, Leinonen R, Smith RE, Zheng-Bradley X, Bentley DR, Grocock R,  
795 Humphray S, James T, Kingsbury Z, Lehrach H, Sudbrak R, Albrecht MW, Amstislavskiy VS,



796 Borodina TA, Lienhard M, Mertes F, Sultan M, Timmermann B, Yaspo M-L, Sherry ST, McVean  
797 GA, Mardis ER, Wilson RK, Fulton L, Fulton R, Weinstock GM, Durbin RM, Balasubramaniam S,  
798 Burton J, Danecek P, Keane TM, Kolb-Kokocinski A, McCarthy S, Stalker J, Quail M, Schmidt JP,  
799 Davies CJ, Gollub J, Webster T, Wong B, Zhan Y, Auton A, Gibbs RA, Yu F, Bainbridge M,  
800 Challis D, Evani US, Lu J, Muzny D, Nagaswamy U, Reid J, Sabo A, Wang Y, Yu J, Wang J, Coin  
801 LJM, Fang L, Guo X, Jin X, Li G, Li Q, Li Y, Li Z, Lin H, Liu B, Luo R, Qin N, Shao H, Wang B, Xie  
802 Y, Ye C, Yu C, Zhang F, Zheng H, Zhu H, Marth GT, Garrison EP, Kural D, Lee W-P, Fung Leong  
803 W, Ward AN, Wu J, Zhang M, Lee C, Griffin L, Hsieh C-H, Mills RE, Shi X, von Grotthuss M,  
804 Zhang C, Daly MJ, DePristo MA, Altshuler DM, Banks E, Bhatia G, Carneiro MO, del Angel G,  
805 Gabriel SB, Genovese G, Gupta N, Handsaker RE, Hartl C, Lander ES, McCarroll SA, Nemesh  
806 JC, Poplin RE, Schaffner SF, Shakir K, Yoon SC, Lihm J, Makarov V, Jin H, Kim W, Cheol Kim K,  
807 Korbel JO, Rausch T, Flicek P, Beal K, Clarke L, Cunningham F, Herrero J, McLaren WM, Ritchie  
808 GRS, Smith RE, Zheng-Bradley X, Clark AG, Gottipati S, Keinan A, Rodriguez-Flores JL, Sabeti  
809 PC, Grossman SR, Tabrizi S, Tariyal R, Cooper DN, Ball EV, Stenson PD, Bentley DR, Barnes B,  
810 Bauer M, Keira Cheetham R, Cox T, Eberle M, Humphray S, Kahn S, Murray L, Peden J, Shaw  
811 R, Ye K, Batzer MA, Konkel MK, Walker JA, MacArthur DG, Lek M, Sudbrak, Amstislavskiy VS,  
812 Herwig R, Shriver MD, Bustamante CD, Byrnes JK, De La Vega FM, Gravel S, Kenny EE, Kidd  
813 JM, Lacroute P, Maples BK, Moreno-Estrada A, Zakharia F, Halperin E, Baran Y, Craig DW,  
814 Christoforides A, Homer N, Izatt T, Kurdoglu AA, Sinari SA, Squire K, Sherry ST, Xiao C, Sebat J,  
815 Bafna V, Ye K, Burchard EG, Hernandez RD, Gignoux CR, Haussler D, Katzman SJ, James Kent  
816 W, Howie B, Ruiz-Linares A, Dermitzakis ET, Lappalainen T, Devine SE, Liu X, Maroo A, Tallon  
817 LJ, Rosenfeld JA, Michelson LP, Abecasis GR, Min Kang H, Anderson P, Angius A, Biggam A,  
818 Blackwell T, Busonero F, Cucca F, Fuchsberger C, Jones C, Jun G, Li Y, Lyons R, Maschio A,  
819 Porcu E, Reinier F, Sanna S, Schlessinger D, Sidore C, Tan A, Kate Trost M, Awadalla P,  
820 Hodgkinson A, Lunter G, McVean GA, Marchini JL, Myers S, Churchhouse C, Delaneau O,  
821 Gupta-Hinch A, Iqbal Z, Mathieson I, Rimmer A, Xifara DK, Oleksyk TK, Fu Y, Liu X, Xiong M,  
822 Jorde L, Witherspoon D, Xing J, Eichler EE, Browning BL, Alkan C, Hajirasouliha I, Hormozdiari  
823 F, Ko A, Sudmant PH, Mardis ER, Chen K, Chinwalla A, Ding L, Dooling D, Koboldt DC, McLellan  
824 MD, Wallis JW, Wendl MC, Zhang Q, Durbin RM, Hurler ME, Tyler-Smith C, Albers CA, Ayub Q,  
825 Balasubramaniam S, Chen Y, Coffey AJ, Colonna V, Danecek P, Huang N, Jostins L, Keane TM,  
826 Li H, McCarthy S, Scally A, Stalker J, Walter K, Xue Y, Zhang Y, Gerstein MB, Abyzov A,  
827 Balasubramaniam S, Chen J, Clarke D, Fu Y, Habegger L, Harmanci AO, Jin M, Khurana E,  
828 Jasmine Mu X, Sisu C, Li Y, Luo R, Zhu H, Lee C, Griffin L, Hsieh C-H, Mills RE, Shi X, von  
829 Grotthuss M, Zhang C, Marth GT, Garrison EP, Kural D, Lee W-P, Ward AN, Wu J, Zhang M,  
830 McCarroll SA, Altshuler DM, Banks E, del Angel G, Genovese G, Handsaker RE, Hartl C,  
831 Nemesh JC, Shakir K, Yoon SC, Lihm J, Makarov V, Degenhardt J, Flicek P, Clarke L, Smith RE,  
832 Zheng-Bradley X, Korbel JO, Rausch T, Stütz AM, Bentley DR, Barnes B, Keira Cheetham R,  
833 Eberle M, Humphray S, Kahn S, Murray L, Shaw R, Ye K, Batzer MA, Konkel MK, Walker JA,  
834 Lacroute P, Craig DW, Homer N, Church D, Xiao C, Sebat J, Bafna V, Michaelson JJ, Ye K,  
835 Devine SE, Liu X, Maroo A, Tallon LJ, Lunter G, McVean GA, Iqbal Z, Witherspoon D, Xing J,  
836 Eichler EE, Alkan C, Hajirasouliha I, Hormozdiari F, Ko A, Sudmant PH, Chen K, Chinwalla A,  
837 Ding L, McLellan MD, Wallis JW, Hurler ME, Blackburne B, Li H, Lindsay SJ, Ning Z, Scally A,  
838 Walter K, Zhang Y, Gerstein MB, Abyzov A, Chen J, Clarke D, Khurana E, Jasmine Mu X, Sisu C,  
839 Gibbs RA, Yu F, Bainbridge M, Challis D, Evani US, Kovar C, Lewis L, Lu J, Muzny D,  
840 Nagaswamy U, Reid J, Sabo A, Yu J, Guo X, Li Y, Wu R, Marth GT, Garrison EP, Fung Leong W,  
841 Ward AN, del Angel G, DePristo MA, Gabriel SB, Gupta N, Hartl C, Poplin RE, Clark AG,  
842 Rodriguez-Flores JL, Flicek P, Clarke L, Smith RE, Zheng-Bradley X, MacArthur DG, Bustamante  
843 CD, Gravel S, Craig DW, Christoforides A, Homer N, Izatt T, Sherry ST, Xiao C, Dermitzakis ET,  
844 Abecasis GR, Min Kang H, McVean GA, Mardis ER, Dooling D, Fulton L, Fulton R, Koboldt DC,  
845 Durbin RM, Balasubramaniam S, Keane TM, McCarthy S, Stalker J, Gerstein MB,  
846 Balasubramaniam S, Habegger L, Garrison EP, Gibbs RA, Bainbridge M, Muzny D, Yu F, Yu J,  
847 del Angel G, Handsaker RE, Makarov V, Rodriguez-Flores JL, Jin H, Kim W, Cheol Kim K, Flicek  
848 P, Beal K, Clarke L, Cunningham F, Herrero J, McLaren WM, Ritchie GRS, Zheng-Bradley X,  
849 Tabrizi S, MacArthur DG, Lek M, Bustamante CD, De La Vega FM, Craig DW, Kurdoglu AA,  
850 Lappalainen T, Rosenfeld JA, Michelson LP, Awadalla P, Hodgkinson A, McVean GA, Chen K,  
851 Tyler-Smith C, Chen Y, Colonna V, Frankish A, Harrow J, Xue Y, Gerstein MB, Abyzov A,

- 852 Balasubramanian S, Chen J, Clarke D, Fu Y, Harmanci AO, Jin M, Khurana E, Jasmine Mu X,  
853 Sisu C, Gibbs RA, Fowler G, Hale W, Kalra D, Kovar C, Muzny D, Reid J, Wang J, Guo X, Li G,  
854 Li Y, Zheng X, Altshuler DM, Flicek P, Clarke L, Barker J, Kelman G, Kulesha E, Leinonen R,  
855 McLaren WM, Radhakrishnan R, Roa A, Smirnov D, Smith RE, Streeter I, Toneva I, Vaughan B,  
856 Zheng-Bradley X, Bentley DR, Cox T, Humphray S, Kahn S, Sudbrak R, Albrecht MW, Lienhard  
857 M, Craig DW, Izatt T, Kurdoglu AA, Sherry ST, Ananiev V, Belaia Z, Beloslyudtsev D, Bouk N,  
858 Chen C, Church D, Cohen R, Cook C, Garner J, Hefferon T, Kimelman M, Liu C, Lopez J, Meric  
859 P, O'Sullivan C, Ostapchuk Y, Phan L, Ponomarov S, Schneider V, Shekhtman E, Sirotkin K,  
860 Slotta D, Xiao C, Zhang H, Haussler D, Abecasis GR, McVean GA, Alkan C, Ko A, Dooling D,  
861 Durbin RM, Balasubramanian S, Keane TM, McCarthy S, Stalker J, Chakravarti A, Knoppers  
862 BM, Abecasis GR, Barnes KC, Beiswanger C, Burchard EG, Bustamante CD, Cai H, Cao H,  
863 Durbin RM, Gharani N, Gibbs RA, Gignoux CR, Gravel S, Henn B, Jones D, Jorde L, Kaye JS,  
864 Keinan A, Kent A, Kerasidou A, Li Y, Mathias R, McVean GA, Moreno-Estrada A, Ossorio PN,  
865 Parker M, Reich D, Rotimi CN, Royal CD, Sandoval K, Su Y, Sudbrak R, Tian Z, Timmermann B,  
866 Tishkoff S, Toji LH, Tyler-Smith C, Via M, Wang Y, Yang H, Yang L, Zhu J, Bodmer W, Bedoya  
867 G, Ruiz-Linares A, Zhi Ming C, Yang G, Jia You C, Peltonen L, Garcia-Montero A, Orfao A, Dutil  
868 J, Martinez-Cruzado JC, Oleksyk TK, Brooks LD, Felsenfeld AL, McEwen JE, Clemm NC,  
869 Duncanson A, Dunn M, Green ED, Guyer MS, Peterson JL, Abecasis GR, Auton A, Brooks LD,  
870 DePristo MA, Durbin RM, Handsaker RE, Min Kang H, Marth GT, McVean GA. An integrated  
871 map of genetic variation from 1,092 human genomes. *Nature* 2012; 491:56  
872 **64.** McKibben RA, Zhao D, Lutsey PL, Schneider ALC, Guallar E, Mosley TH, Michos ED. Factors  
873 Associated With Change in 25-Hydroxyvitamin D Levels Over Longitudinal Follow-Up in the ARIC  
874 Study. *The Journal of clinical endocrinology and metabolism* 2016; 101:33-43  
875 **65.** Robinson-Cohen C, Hoofnagle AN, Ix JH, et al. Racial differences in the association of serum 25-  
876 hydroxyvitamin d concentration with coronary heart disease events. *JAMA* 2013; 310:179-188  
877 **66.** Zhu Z, Zhang F, Hu H, Bakshi A, Robinson MR, Powell JE, Montgomery GW, Goddard ME, Wray  
878 NR, Visscher PM, Yang J. Integration of summary data from GWAS and eQTL studies predicts  
879 complex trait gene targets. *Nature Genetics* 2016; 48:481  
880 **67.** Ware EB, Schmitz LL, Faul JD, Gard A, Mitchell C, Smith JA, Zhao W, Weir D, Kardina SL.  
881 Heterogeneity in polygenic scores for common human traits. *bioRxiv* 2017:106062  
882 **68.** Yang J, Lee SH, Goddard ME, Visscher PM. GCTA: A Tool for Genome-wide Complex Trait  
883 Analysis. *American Journal of Human Genetics* 2011; 88:76-82  
884 **69.** Johnson AD, Handsaker RE, Pulit SL, Nizzari MM, O'Donnell CJ, de Bakker PIW. SNAP: a web-  
885 based tool for identification and annotation of proxy SNPs using HapMap. *Bioinformatics* 2008;  
886 24:2938-2939  
887 **70.** Coram MA, Fang H, Candille SI, Assimes TL, Tang H. Leveraging Multi-ethnic Evidence for Risk  
888 Assessment of Quantitative Traits in Minority Populations. *American Journal of Human Genetics*  
889 2017; 101:218-226  
890 **71.** Vassos E, Di Forti M, Coleman J, Iyegbe C, Prata D, Euesden J, O'Reilly P, Curtis C, Kolliakou A,  
891 Patel H, Newhouse S, Traylor M, Ajnakina O, Mondelli V, Marques TR, Gardner-Sood P,  
892 Aitchison KJ, Powell J, Atakan Z, Greenwood KE, Smith S, Ismail K, Pariante C, Gaughran F,  
893 Dazzan P, Markus HS, David AS, Lewis CM, Murray RM, Breen G. An Examination of Polygenic  
894 Score Risk Prediction in Individuals With First-Episode Psychosis. *Biological Psychiatry* 2017;  
895 81:470-477  
896 **72.** Márquez-Luna C, Loh P-R, Price AL. Multiethnic polygenic risk scores improve risk prediction in  
897 diverse populations. *Genetic Epidemiology* 2017; 41:811-823  
898 **73.** Cranney A, Horsley T, O'Donnell S, Weiler H, Puil L, Ooi D, Atkinson S, Ward L, Moher D, Hanley  
899 D, Fang M, Yazdi F, Garrity C, Sampson M, Barrowman N, Tsertsvadze A, Mamaladze V.  
900 Effectiveness and safety of vitamin D in relation to bone health. *Evidence Report/Technology*  
901 *Assessment* 2007:1-235  
902 **74.** Haskins J. Wanted: 1 million people to help transform precision medicine: All of Us program open  
903 for enrollment. *The Nation's Health* 2018; 48:1-16  
904 **75.** Mak T, Porsch RM, Choi SW, Sham PC. Polygenic scores for UK Biobank scale data. *bioRxiv*  
905 2018;  
906

907 **Figure 1. The polygenic score (PGS) performance in those of European or African ancestry.** The x-  
908 axis displays selected p-value thresholds for single nucleotide polymorphisms (SNPs) included in the  
909 PGS. The y-axis displays the proportion of phenotypic variance captured by the PGS. Yellow bars  
910 correspond to a strong association (more significant p-value) between the PGS and log(25(OH)D) than do  
911 blue bars. In panel A, the most optimally performing PGS has the tallest bar (p-value threshold = 0.00035)  
912 and captures 1.4% of the variance in log[25(OH)D]. In panel B, the most optimally performing PGS has  
913 the tallest bar (p-value threshold = 0.01265) and captures 2.9% of the variance in log[25(OH)D].

914

915 **Figure 2. Visual representation of the association between polygenic score (PGS) decile and**  
916 **normalized vitamin D concentrations in those of European ancestry.** The x-axis is the PGS decile,  
917 where lower decile means more risk of low vitamin D concentrations. The y-axis is vitamin D  
918 concentrations (normalized for comparison between cohorts). Panel A is a plot for the subset of ARIC  
919 samples used to discern the optimal p-value threshold for the PGS (n=1000); panel B is a plot for the  
920 remaining independent samples (n=8,569). While the exact trend varies by plot, the general trend is that  
921 when the PGS decreases (i.e. higher genetic risk) 25(OH)D concentrations decrease. In panel A, moving  
922 from the lowest risk to the highest risk decile decreases vitamin D concentrations by 4.0 ng/ml. In panel B,  
923 moving from the lowest risk to the highest risk decile decreases vitamin D concentrations by 3.0 ng/ml.

924

925 **Figure 3. Visual representation of the association between polygenic score (PGS) decile and**  
926 **normalized vitamin D concentrations in those of African ancestry (n=1,099).** The x-axis is the PGS  
927 decile, where lower decile means more risk of low vitamin D concentration. The y-axis is vitamin D  
928 concentrations (normalized for comparison between cohorts). The trend is that when the PGS decreases  
929 (i.e. higher genetic risk) 25(OH)D concentrations decrease. Moving from the lowest risk to the highest risk  
930 quintile decreases vitamin D concentrations by 2.8 ng/ml (p=0.0463).

931

932 **Figure 4. Overall single nucleotide polymorphism (SNP) heritability, polygenic score (PGS) SNP**  
933 **heritability and replicated genome-wide association study (GWAS) SNP heritability in those of**  
934 **European ancestry.** Where sample allowed for calculation, the PGS explains more heritability than  
935 previous replicated GWAS findings, albeit leaving much of the heritability unexplained.

Figure 1: The PGS performance in those of European (A) or African (B) ancestry

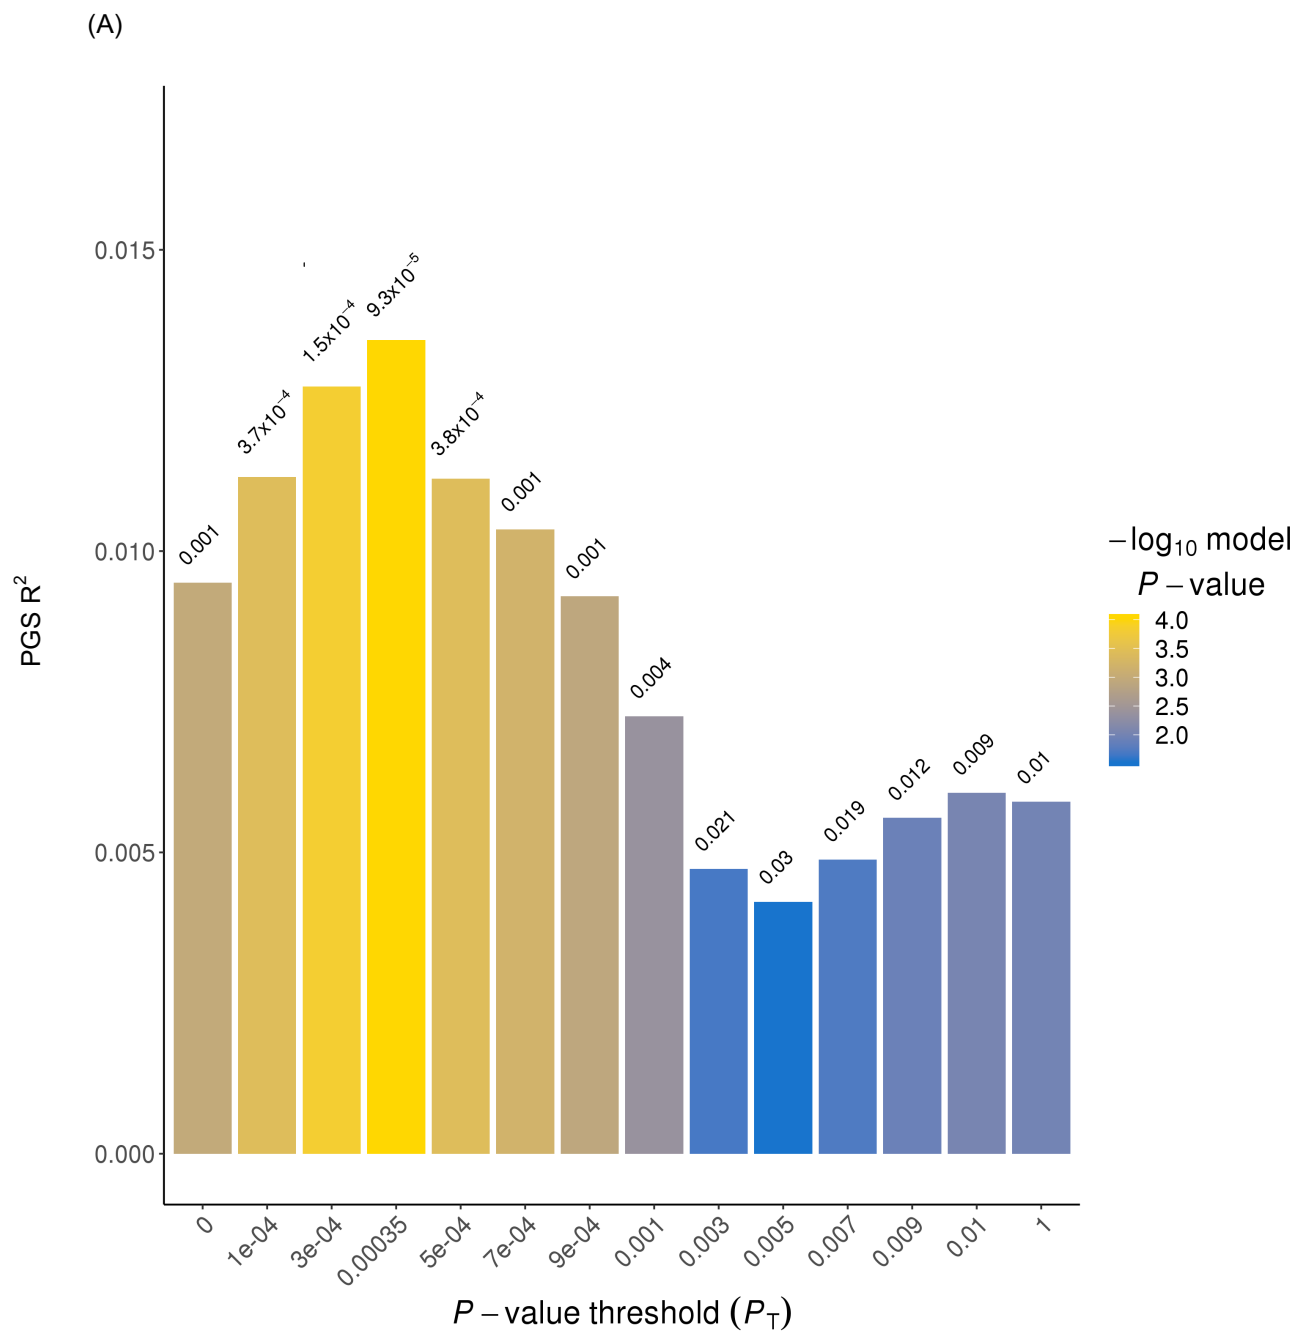

(B)

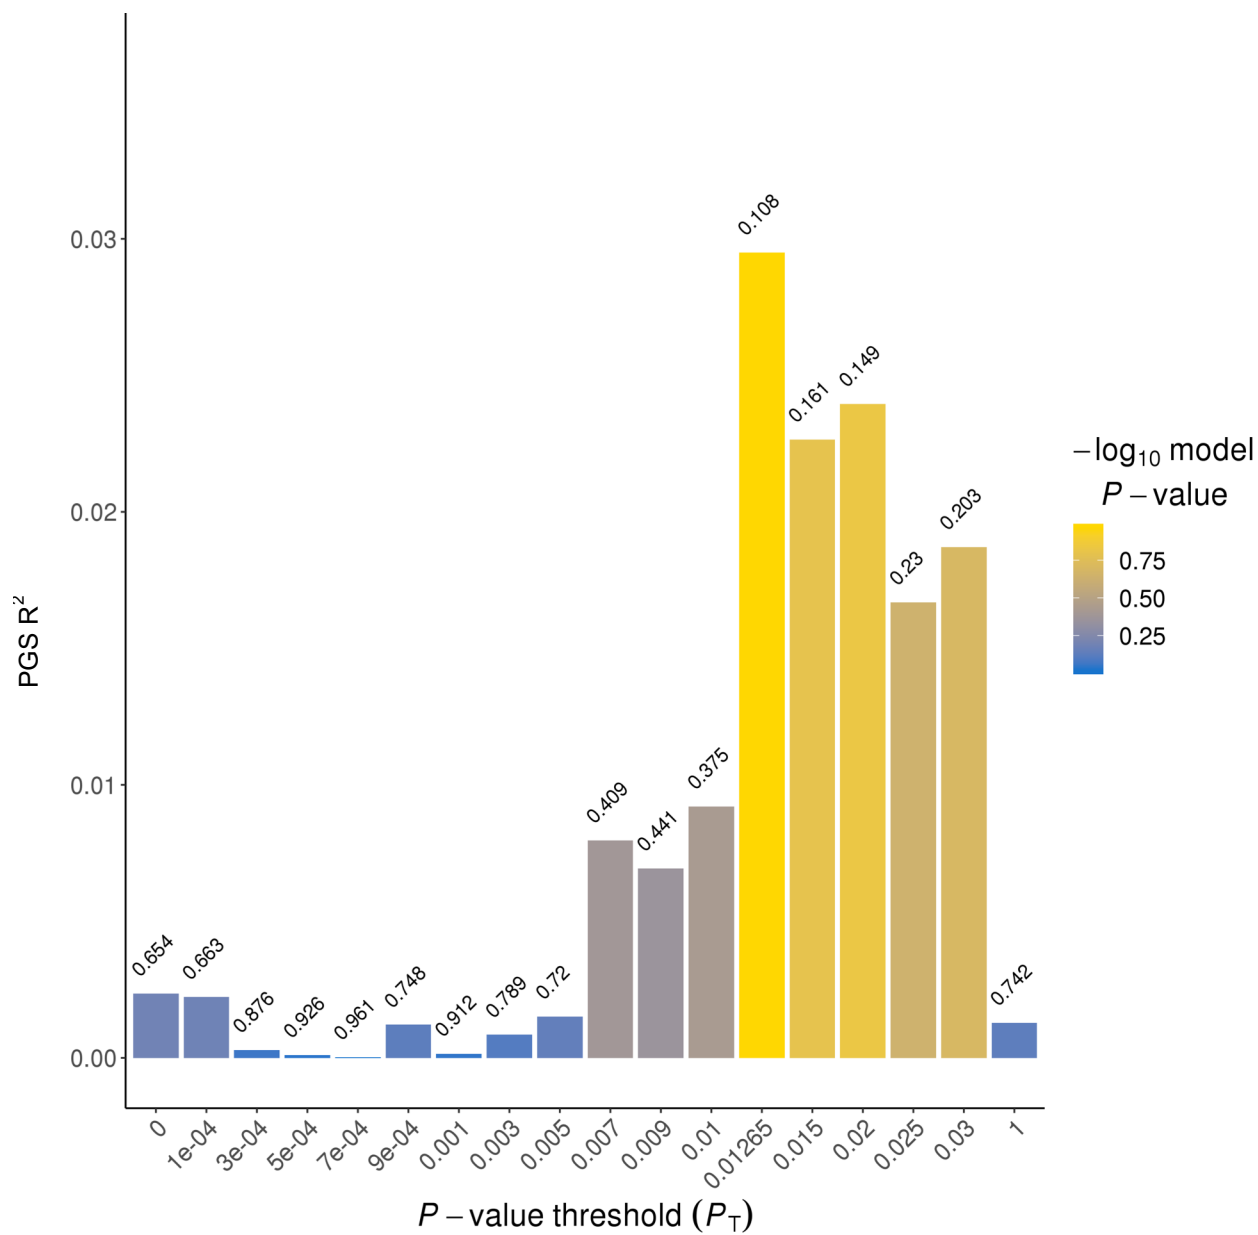

Figure 2: Visual representation of the association between PGS decile and normalized vitamin D concentrations in those of European ancestry (n=8,569)

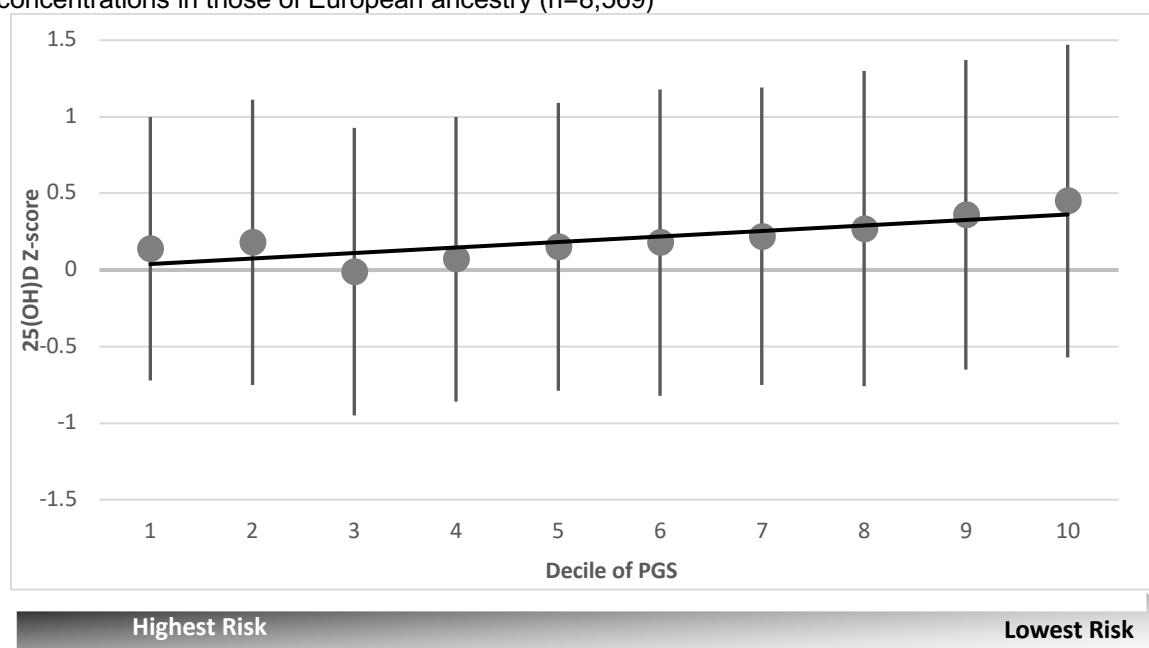

Figure 3: Visual representation of the association between PGS decile and normalized vitamin D concentrations in those of African ancestry (n=1,099)

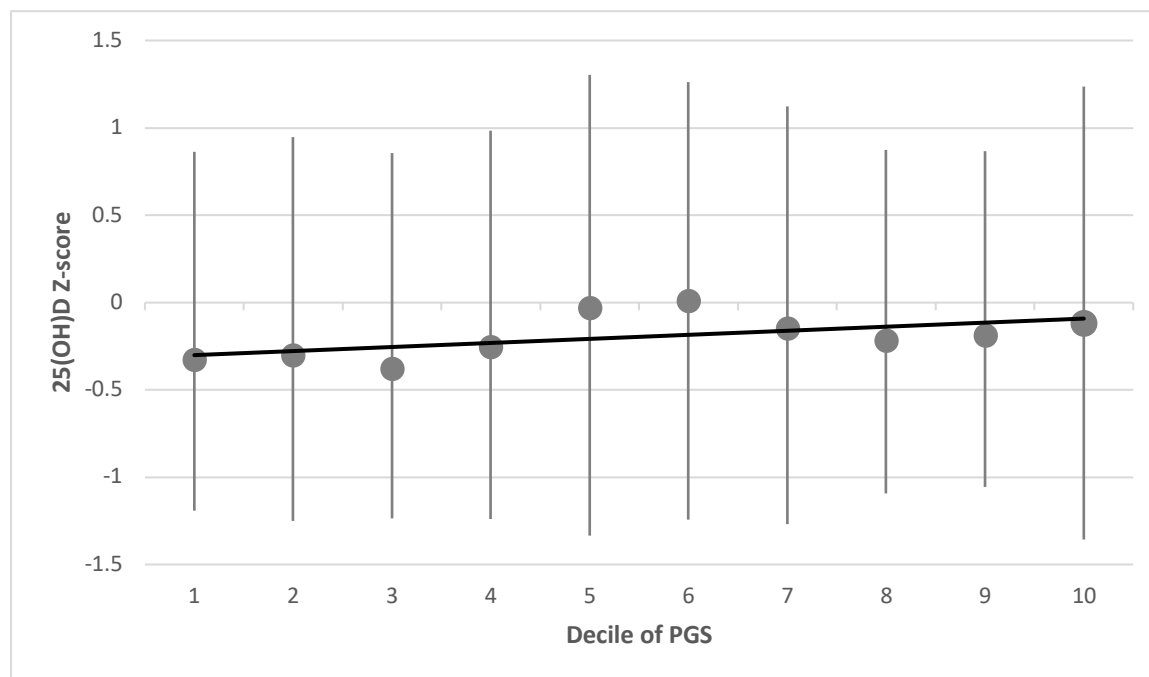

Highest Risk

Lowest Risk

Figure 4: Overall SNP heritability, PGS SNP heritability and replicated GWAS SNP heritability in those of European ancestry

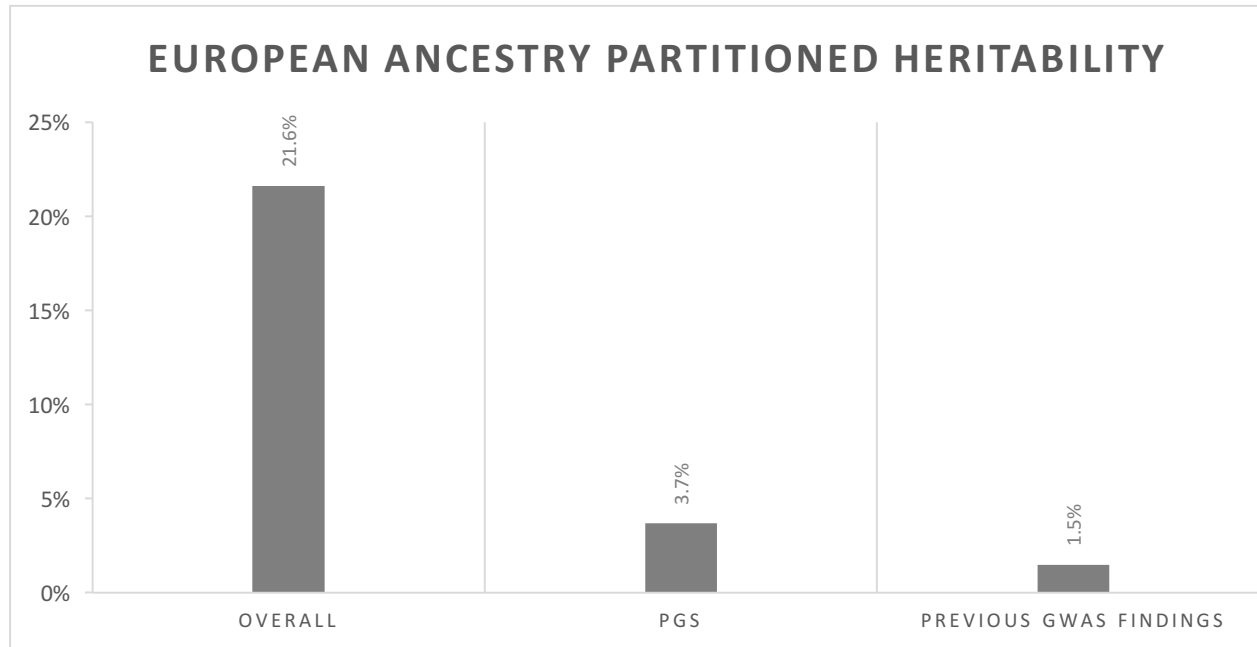



Table 1: Previous GWAS SNPs

| SNP ID                  | Chromosome | Position <sup>e</sup> | Gene                 | EU LD block size | AFA LD block size |
|-------------------------|------------|-----------------------|----------------------|------------------|-------------------|
| rs2282679               | 4          | 72608383              | <i>GC</i>            | 1200 kb          | 2 kb              |
| rs79666294 <sup>a</sup> | 5          | 155047146             | <i>KIF4B</i>         | NA <sup>c</sup>  | 200 kb            |
| rs10741657              | 11         | 14893332              | <i>CYP2R1</i>        | 480 kb           | 300 kb            |
| rs12785878              | 11         | 71456403              | <i>NADSYN1/DHCR7</i> | 120 kb           | 84 kb             |
| rs719700                | 12         | 45635426              | <i>ANO6/ARID2</i>    | NA <sup>c</sup>  | 2 kb              |
| rs10745742              | 12         | 95964751              | <i>AMDHD1</i>        | 50 kb            | NA <sup>d</sup>   |
| rs1410656               | 13         | 46968386              | <i>HTR2A</i>         | NA <sup>c</sup>  | 28 kb             |
| rs8018720               | 14         | 39086981              | <i>SEC23A</i>        | 180 kb           | NA <sup>d</sup>   |
| rs6013897 <sup>b</sup>  | 20         | 54125940              | <i>CYP24A1</i>       | 10 kb            | 4 kb              |

Abbreviations: SNP, single nucleotide polymorphism; EU, European-ancestry; AFA, African-ancestry; LD, linkage disequilibrium

<sup>a</sup>not in ARIC African-ancestry imputed data; using the RAGGR tool by USC, SNP rs17570361 was found to be a good proxy ( $r^2$  0.94)

<sup>b</sup>not in ARIC African-ancestry imputed data; no proxy for rs6013897, so SNPs within 2kb of its position (52742479) were removed

<sup>c</sup>Novel African ancestry SNP

<sup>d</sup>Novel European ancestry SNP

<sup>e</sup>Build 37

Table 2. Sample characteristics

| Sample                                                       | Metric                                   | European-ancestry set | African-ancestry set |
|--------------------------------------------------------------|------------------------------------------|-----------------------|----------------------|
| PGS development sample (from ARIC)                           | Sample Size                              | 1,000                 | 57                   |
|                                                              | % Female                                 | 53.2%                 | 49.1%                |
|                                                              | Mean Age (SD) [years]                    | 57.1(5.7)             | 55.6 (6.2)           |
|                                                              | Mean BMI (SD) [kg/m <sup>2</sup> ]       | 27.3 (4.8)            | 28.6 (5.7)           |
|                                                              | Mean Available UV radiation (SD) [units] | 5.0 (2.5)             | 7.1 (2.4)            |
|                                                              | Mean Vitamin D Intake (SD) [IU]          | 219.2 (135.2)         | 221.2 (137.3)        |
|                                                              | Mean 25(OH)D (SD) [ng/ml]                | 25.7 (8.7)            | 20.9 (7.8)           |
| PGS validation sample (from ARIC, MESA and WHI) <sup>a</sup> | Sample Size                              | 8,569                 | 1,042                |
|                                                              | % Female                                 | 56.1%                 | 84% <sup>b</sup>     |
|                                                              | Mean Age (SD) [years]                    | 58.9 (7.7)            | 62.0 (8.5)           |
|                                                              | Mean BMI (SD) [kg/m <sup>2</sup> ]       | 27.5 (5.0)            | 30.8 (6.3)           |
|                                                              | Mean Available UV radiation (SD) [units] | 4.9 (2.5)             | 5.4 (2.5)            |
|                                                              | Mean Vitamin D Intake (SD) [IU]          | 172.3 (157.0)         | 99.7 (126.1)         |
|                                                              | Mean 25(OH)D (SD) [ng/ml]                | 26.5 (9.7)            | 19.2 (13.6)          |
| Heritability estimation sample (from ARIC)                   | Sample Size                              | 7,119                 | 1,719                |
|                                                              | % Female                                 | 53.6%                 | 63.5%                |
|                                                              | Mean Age (SD) [years]                    | 57.1 (5.7)            | 56.4 (5.8)           |
|                                                              | Mean BMI (SD) [kg/m <sup>2</sup> ]       | 27.3 (4.8)            | 30.2 (6.2)           |
|                                                              | Mean Available UV radiation (SD) [units] | 5.0 (2.5)             | 6.9 (2.3)            |
|                                                              | Mean Vitamin D Intake (SD) [IU]          | 222.8 (144.4)         | 215.7 (150.3)        |
|                                                              | Mean 25(OH)D (SD) [ng/ml]                | 25.9 (8.8)            | 19.1 (7.1)           |

Abbreviations: PGS, polygenic score; SD, standard deviation; BMI, body mass index; UV, ultraviolet

<sup>a</sup>MANOVA global test (performed in SAS (version 9.4) revealed differences in one or more variables by cohort, therefore cohort was adjusted for in all models that included multiple cohorts

<sup>b</sup>Notably greater % Female than other sets, because this set includes independent samples in MESA (n=342) and WHI (n=700)

Table 3: Performance of optimal PGS in each ancestry

| Ancestry | p-value cut-off | # SNPs          | Cohort                     | PGS R <sup>2</sup> (model R <sup>2</sup> ) | p-value <sup>a</sup>  |
|----------|-----------------|-----------------|----------------------------|--------------------------------------------|-----------------------|
| European | 0.00035         | 341             | Tuning (n=1,000)           | 0.014 (0.14)                               | 9.3x10 <sup>-5</sup>  |
|          |                 |                 | Validation (n=8,569)       | 0.0098 (0.17)                              | 1.1x10 <sup>-23</sup> |
| African  | 0.01265         | 32,269          | Tuning (n=57)              | 0.029 (0.49)                               | 0.11                  |
|          |                 |                 | Validation (n=1,042)       | 0.002 (0.03)                               | 0.15                  |
| African  | 1.0             | NA <sup>b</sup> | Full-Independent (n=1,099) | 0.003 (0.04)                               | 0.05                  |

Abbreviations: SNPs, single nucleotide polymorphism; PGS, polygenic score

<sup>a</sup>p-value for association between PGS and log[25(OH)D]

<sup>b</sup>this PGS was created via mega-analysis of three cohorts; # SNPs varies by cohort
